# Supplementary material
Source: PubMed Central journal article supplement (PMC5510762)
Supplement: mmc2.pdf [file mmc2.pdf]

# The Energetics of Chromophore Binding in the Visual Photoreceptor Rhodopsin

He Tian,<sup>1</sup> Thomas P. Sakmar,<sup>1,2,\*</sup> and Thomas Huber<sup>1,\*</sup>

<sup>1</sup>Laboratory of Chemical Biology and Signal Transduction, The Rockefeller University, New York, New York and <sup>2</sup>Department of Neurobiology, Care Sciences and Society, Division of Neurogeriatrics, Center for Alzheimer Research, Karolinska Institutet, Huddinge, Sweden

**ABSTRACT** The visual photoreceptor rhodopsin is a prototypical G-protein-coupled receptor (GPCR) that stabilizes its inverse agonist ligand, 11-*cis*-retinal (11CR), by a covalent, protonated Schiff base linkage. In the visual dark adaptation, the fundamental molecular event after photobleaching of rhodopsin is the recombination reaction between its apoprotein opsin and 11CR. Here we present a detailed analysis of the kinetics and thermodynamics of this reaction, also known as the “regeneration reaction”. We compared the regeneration of purified rhodopsin reconstituted into phospholipid/detergent bicelles with rhodopsin reconstituted into detergent micelles. We found that the lipid bilayer of bicelles stabilized the chromophore-free opsin over the long timescale required for the regeneration experiments, and also facilitated the ligand reuptake reaction. We utilized genetic code expansion and site-specific bioorthogonal labeling of rhodopsin with Alexa488 to enable, to our knowledge, a novel fluorescence resonance energy transfer-based measurement of the binding kinetics between opsin and 11CR. Based on these results, we report a complete energy diagram for the regeneration reaction of rhodopsin. We show that the dissociation reaction of rhodopsin to 11CR and opsin has a 25-pM equilibrium dissociation constant, which corresponds to only 0.3 kcal/mol stabilization compared to the noncovalent, tightly bound antagonist-GPCR complex of iodopindolol and  $\beta$ -adrenergic receptor. However, 11CR dissociates four orders-of-magnitude slower than iodopindolol, which corresponds to a 6-kcal/mol higher dissociation free energy barrier. We further used isothermal titration calorimetry to show that ligand binding in rhodopsin is enthalpy driven with  $-22$  kcal/mol, which is 12 kcal/mol more stable than the antagonist-GPCR complex. Our data provide insights into the ligand-receptor binding reaction for rhodopsin in particular, and for GPCRs more broadly.

## INTRODUCTION

The rod cell visual photoreceptor rhodopsin (Rho) found predominantly in rod outer segment (ROS) disk membranes consists of an apoprotein, opsin, and a chromophore, 11-*cis*-retinal (11CR) (1–4). In the dark state, 11CR is covalently bound to opsin through a protonated Schiff base (PSB) linkage with Glu-113 acting as the counterion (5). Light illumination isomerizes the inverse agonist 11CR to an agonist all-*trans*-retinal (ATR), which activates the receptor to initiate the cGMP protein cascade. The deprotonated Schiff base linkage in the photoactivated rhodopsin (Meta-II) hydrolyzes, causing ATR to dissociate from the ligand binding pocket of Rho. To recycle the photoreceptor, the apoprotein opsin recombines with 11CR supplied from the retinal pigment epithelium, a process referred to as “regeneration”

(6). Regeneration of Rho in the dark after photoactivation is the fundamental molecular reaction underlying visual dark adaptation. However, the energetics of the recombination reaction between opsin and 11CR remains to be understood. Because Rho is a prototypical member of the class-A G protein-coupled receptors (GPCRs), a mechanistic understanding of ligand binding in Rho should also provide insights into the structure-function relationship of this transmembrane receptor family.

Here we utilize fluorescence resonance energy transfer (FRET)-based assays to measure the kinetics of the recombination reaction between 11CR and opsin. We prepared expressed recombinant Rho with a genetically encoded *p*-azido-Phe (azF) (7) at the second intracellular loop that was labeled with Alexa488 using a robust bioorthogonal labeling reaction (8–11). We utilize Alexa488-Rho and unlabeled Rho purified from bovine ROS to characterize the recombination of 11CR and opsin. We show that the 1-palmitoyl-2-oleoyl-*sn*-glycero-3-phosphocholine/3-[(3-cholamidopropyl) dimethylammonio]-1-propanesulfonate (POPC/CHAPS) bicelles serve as a suitable model system for characterizing

Submitted January 6, 2017, and accepted for publication May 25, 2017.

\*Correspondence: sakmar@rockefeller.edu or hubert@rockefeller.edu

He Tian's present address is Department of Chemistry and Chemical Biology, Harvard University, Cambridge, Massachusetts.

Editor: Andreas Engel.

<http://dx.doi.org/10.1016/j.bpj.2017.05.036>

© 2017 Biophysical Society.

chromophore binding in Rho. We then measure the binding kinetics at several temperatures. In an earlier report (12), we have obtained the temperature-dependent kinetics for its reverse reaction, i.e., the light-independent, spontaneous dissociation rate of 11CR from Rho. These kinetics data enable us to calculate the activation enthalpy and entropic terms from the Eyring plot. We also measure the overall enthalpy change of the reaction using isothermal titration calorimetry (ITC). Based on these kinetic and thermodynamic measurements, we are now able to derive an energy diagram for the reversible recombination reaction between 11CR and opsin (Fig. 1). We compared the energetics of ligand binding in Rho and adrenergic receptors. Interestingly, we found that the equilibrium dissociation constant ( $K_d$ ) of 11CR for opsin is similar to that of certain high-affinity diffusible ligands for adrenergic receptors. Nonetheless, the ligand binding and dissociation for Rho is significantly slower, as manifested by the high activation barrier in the energy landscape. The energy diagram we derive here for the Rho regeneration reaction provides a useful guide for interpreting ligand binding modes for GPCRs in general.

## MATERIALS AND METHODS

### Materials

*n*-Dodecyl- $\beta$ -D-maltoside (DM) and 3-[(3-cholamidopropyl)dimethylammonio]-1-propanesulfonate (CHAPS) were obtained from Anatrace (Maumee, OH). 1-Palmitoyl-2-oleoyl-*sn*-glycero-3-phosphocholine (POPC) was obtained from Avanti Polar Lipids (Alabaster, AL). 11-*cis*-Retinal was a gift from Drs. P. Sorter and V. Toome, Hoffmann-La Roche (Basel, Switzerland).

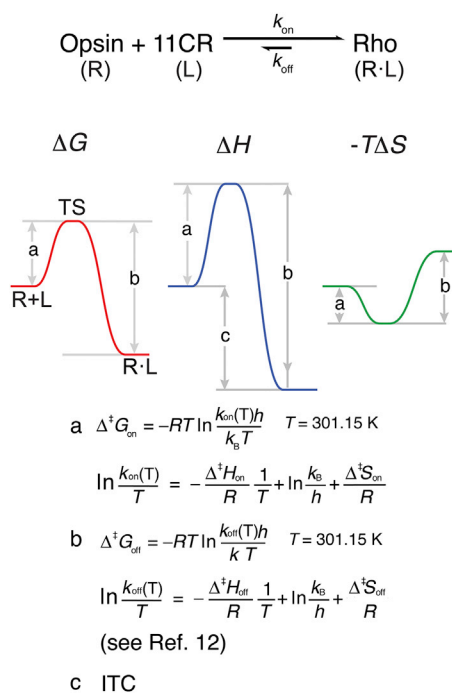

FIGURE 1 Deriving the binding energy landscape from kinetic and thermodynamic relations. To see this figure in color, go online.

### Purifying the pigments

Rho wild-type (wt) samples were purified from bovine ROS. Opsin samples were prepared by photobleaching purified Rho. Alexa488-labeled Rho was prepared by labeling a genetically encoded azido-Phe with Alexa488 fluorophore in a quantitative bioorthogonal labeling reaction (8–10). The detailed methods for preparing these pigment samples are given in the [Supporting Material](#).

### Assessing the stability of opsin solubilized in DM micelles

The purified opsin (15  $\mu\text{L}$ , 4.7  $\mu\text{M}$ , solubilized in 0.1% (w/v) DM) was aliquoted into 1.5-mL Eppendorf tubes (Hamburg, Germany) and photobleached by irradiating with a 505-nm LED light source (Thorlabs, Newton, NJ) for 30 s. After photobleaching, the samples were kept in the dark at 28°C for varied durations before 135  $\mu\text{L}$  POPC/CHAPS bicelle buffer A (1% (w/v) POPC, 1% (w/v) CHAPS, 125 mM KCl, 25 mM MES, 25 mM HEPES, 12.5 mM KOH, pH 6.0, 450  $\mu\text{L}$ ) supplemented with 11CR was added. The final concentration of opsin was 0.47  $\mu\text{M}$ , and the molar ratio of 11CR to opsin was 1.5:1. The regeneration reaction was allowed to proceed overnight (>15 h) to reach completion. The dark and photobleached spectra of the regenerated samples were recorded on a Lambda 800 UV-Vis spectrophotometer (PerkinElmer, Waltham, MA). In the presence of 11CR, longer exposure to 505-nm LED light (1 min) was required to fully photobleach the photoreceptor. The extent of regeneration was evaluated based on the 500-nm absorbance of the difference spectra.

### Assessing the stability of opsin solubilized in POPC/CHAPS bicelles

The purified opsin (15  $\mu\text{L}$ , 4.7  $\mu\text{M}$ , solubilized in 0.1% DM) was added to POPC/CHAPS bicelle buffer A (120  $\mu\text{L}$ ). After photobleaching and incubation, 11CR diluted in POPC/CHAPS bicelle buffer (15  $\mu\text{L}$  was added to the opsin samples ([11CR]/[opsin] = 1.5:1). The regeneration reaction was allowed to reach completion and analyzed as described above.

### Dynamic light scattering experiment to measure the hydrodynamic radius of POPC/CHAPS bicelles

Various concentrations of 1:1 POPC/CHAPS (lipids w/v: 10, 4.0, 2.0, 1.5, 1.0, 0.50, 0.40, 0.25, and 0.10%) are prepared freshly. Before the dilution, the POPC/CHAPS stock solution and the buffer were filtered with an inorganic membrane filter (Anotop 10, 0.02  $\mu\text{m}$  pore size, 10-mm diameter; Whatman, Maidstone, UK) to remove any contamination with scattering microparticles. Samples were added into a 384-well plate (60  $\mu\text{L}$  each well, black, clear bottom; Greiner Bio-One, Kremstünster, Austria), and then the plate was sealed on top with an Oracal soft PVC film (Orafol Americas, Avon, CT) to prevent evaporation. All the samples in this dynamic light scattering (DLS) experiment were measured in triplicate at 28°C, on a DynaPro Plate Reader II (Wyatt Technology, Goleta, CA). The hydrodynamic radii of bicelles were monitored for up to 14 h. The calculation of bicelle concentration is included in the [Supporting Material](#). Each data point in [Fig. 3](#) represents the average from 15 measurements, with the error bars indicated.

### The measurement of retinal uptake kinetics based on quenching of tryptophan or Alexa488 fluorescence

Fluorescence measurement was done on a SPEX Fluorolog tau-311 spectrofluorometer (Horiba Instruments, Irvine, CA) in photon-counting mode. An

aliquot of purified Rho (30  $\mu\text{L}$ ) was added to the POPC/CHAPS bicelle buffer A (1% (w/v) POPC, 1% (w/v) CHAPS, 125 mM KCl, 25 mM MES, 25 mM HEPES, 12.5 mM KOH, pH 6.0, 450  $\mu\text{L}$ ) under constant stirring. In the tryptophan (Trp)-based experiment, the excitation wavelength was 295 nm with a 0.6-nm bandpass, and the emission was measured at 330 nm with a 15-nm bandpass. The concentration of Rho was typically 0.25–0.30  $\mu\text{M}$ . In the Alexa488-based experiment, the sample was excited at 488 nm with a 0.2-nm bandpass, and the emission was measured at 520 nm with a 15-nm bandpass. In addition to small excitation bandpass to reduce the intensity of the exciting beam, photobleaching was further minimized by integrating the fluorescence signal for 2 s in 30-s intervals, keeping the excitation beam closed using an automatic shutter. Because Alexa488 has a greater quantum yield than Trp, the concentrations of Alexa488-Rho in these experiments were lower, normally in the range of 5–50 nM. After recording the fluorescence signal of dark-state samples, 20  $\mu\text{L}$  of 11CR working dilution (ethanolic stock of 11CR diluted in POPC/CHAPS bicelle buffer A) was added to the cuvette to give a final concentration in the range of 1.5–2.0  $\mu\text{M}$ . For each measurement, the concentration of freshly diluted 11CR was determined by UV-Vis spectroscopy ( $\epsilon_{378\text{ nm}} = 25,600\text{ M}^{-1}\text{ s}^{-1}$ ). The decrease of Trp or Alexa488 fluorescence was fitted with a pseudo first-order exponential decay model to derive the apparent regeneration rate ( $k_{\text{obs}}$ ). The second-order rate constant ( $k_2$ ) for the recombination reaction between opsin and retinal was calculated as  $k_2 = k_{\text{obs}}/[\text{retinal}]$ .

### Determination of the binding enthalpy of 11CR and opsin using ITC

For each measurement, opsin ( $9 \pm 1\ \mu\text{M}$ ) and 11CR (250  $\mu\text{M}$ ) bicelle solutions were prepared fresh in the POPC/CHAPS buffer B (1% (w/v) POPC, and 1% (w/v) CHAPS, 137.5 mM NaCl, 0.25 mM EDTA, 25 mM MES, 25

mM HEPES hemisodium salt, pH 6.0). To avoid the dilution heat of ethanol in water, the ethanolic solution of 11CR was evaporated with dry argon under red light and redissolved in POPC/CHAPS buffer. The solution was centrifuged ( $14,000 \times g$ , 10 min) to remove any insoluble fraction. The baseline curve was generated by sampling the intermediate time points between each injection. In these plots, the signals were corrected by subtracting the baseline. Due to the very slow binding kinetics compared with typical ITC studies of a ligand binding to a protein, the experiments are approximately 10 times longer and the corresponding differential power signals are severalfold smaller.

## RESULTS

### POPC/CHAPS bicelles improve the thermal stability of photobleached Rho

Bicelles are model membranes that consist of long-chain phospholipids, which form the planar lipid bilayer segment, and detergents or short-chain phospholipids, which stabilize the edge of the bilayer. In an earlier report (12), we showed that dark-state Rho was stable in 1% (w/v) POPC/CHAPS bicelles over the timescale of weeks. Here, we evaluated the stability of opsin in POPC/CHAPS bicelles (Fig. 2). Purified Rho was solubilized in POPC/CHAPS bicelles, photobleached, and subsequently incubated at 28°C for various lengths of time. Then the samples were supplemented with fresh 11CR and kept in the dark until regeneration was complete. As a comparison with the bicelle

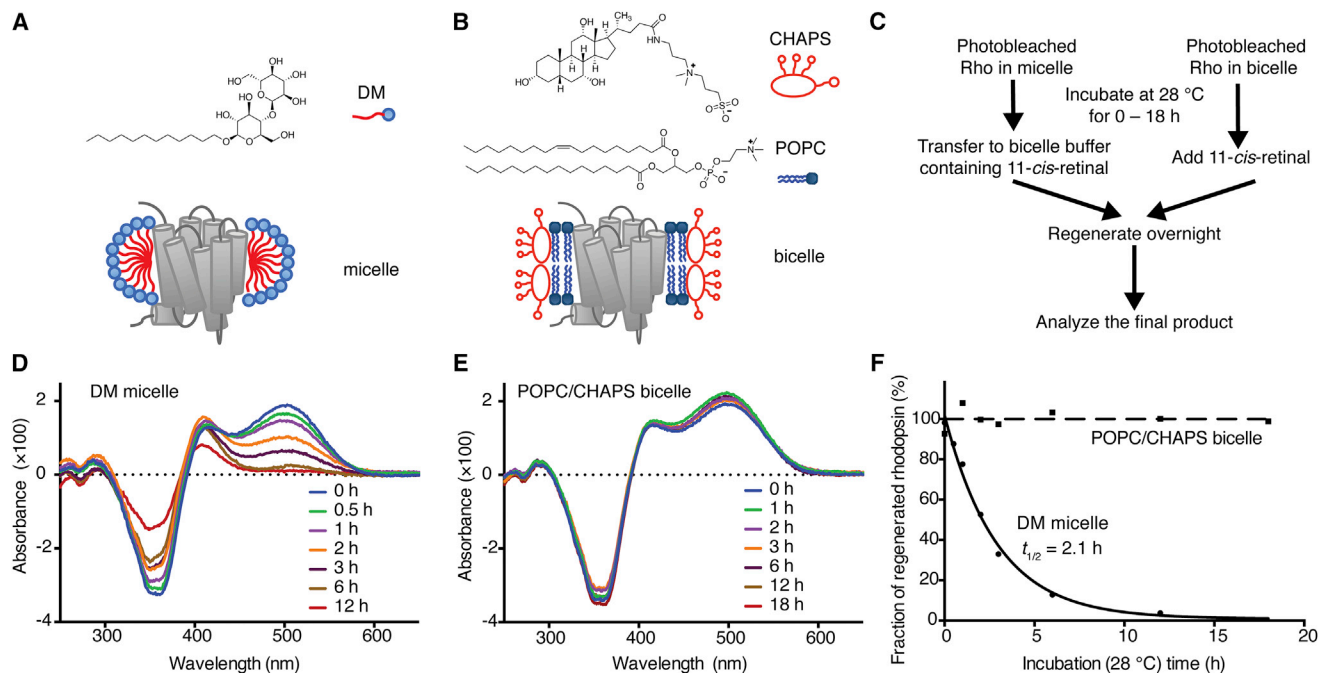

FIGURE 2 Photobleached Rho is more stable in POPC/CHAPS bicelles than it is in DM micelles. (A) The structures of DM and a cartoon of Rho reconstituted in DM micelles. (B) The structures of CHAPS and POPC, and a cartoon of Rho reconstituted in POPC/CHAPS bicelle. (C) The procedures for assaying the stability of bleached Rho in DM micelles or POPC/CHAPS bicelles. (D) The dark-light end-point difference spectral time course of Rho in DM showed a gradual loss of the 500 nm absorbance, indicating the increase of denatured opsin that failed to bind with 11CR. (E) The spectral time course shows that bleached Rho in POPC/CHAPS bicelles after incubation could be regenerated close to completion. (F) The time course of the thermal denaturation of photobleached Rho in DM micelles and POPC/CHAPS bicelles.

system, we also assessed opsin stability in DM detergent micelles. The photobleached samples were first incubated for various lengths of time, then transferred into POPC/CHAPS bicelles to quench the denaturation process. After incubation of excess 11CR, the extent of 11CR binding was assessed based on the recovery of 500-nm absorbance (Fig. 2, *D* and *E*). The denatured, misfolded fraction would lose the ability to bind with 11CR to recover the 500-nm peak. We found that the micelle-solubilized opsin lost the ability to bind with 11CR with a half-life of 2.1 h, whereas 98% of the bicelle-solubilized receptor retained the potential for regeneration after 18 h of incubation (Fig. 2 *F*). We further showed that in bicelles the binding between opsin and 11CR yielded high-purity Rho, and we determined the accurate extinction coefficients of opsin and Rho (Fig. S1; Table S1).

### The size and concentration of bicelles changes as a function of lipid concentration

In the bicelle/water system, the more hydrophilic CHAPS can exist both as monomeric free detergents at a concentration close to its critical micelle concentration and as associated structures in bicelles. The more hydrophobic POPC molecules essentially completely associate as bicelles. When POPC/CHAPS are diluted together, more CHAPS molecules will dissociate from the bicelles, and hence the ratio of CHAPS to POPC in the bicelle structure would decrease. The number of CHAPS molecules in the rim scales with the radius of the bicelle, whereas the number of POPC molecules in the planar center scales with the square of the radius. Therefore, dilution of POPC/CHAPS bicelle would result in an enlarged planar center. When the ratio of CHAPS to POPC is sufficiently low, the bicelle structure would become unstable, begin to aggregate, and form vesicles.

To evaluate the stability of POPC/CHAPS bicelles, we used DLS to monitor the hydrodynamic radius of POPC/CHAPS (w/w) bicelles for different lipid concentrations (Fig. 3 *A*) over a time course of 15 h. We found that at the tested concentrations, the hydrodynamic radii of the POPC/CHAPS bicelles were stable during the measured period. The critical micelle concentration for CHAPS is between 6 and 10 mM, corresponding to a w/v proportion from 0.3 to 0.6%. As a result, a dramatic increase in the bicelle size was observed when POPC/CHAPS was diluted below 1% (w/v), suggesting aggregation of lipids as liposomes. We calculated bicelle concentration as a function of the lipid concentration (Fig. 3 *B*). For 1% POPC/CHAPS, the concentration of bicelles was 27  $\mu\text{M}$ . Based on the above results, we conclude that 1% POPC/CHAPS results in well-dispersed bicelles that maintain the stability of ligand-free opsin. We used this condition throughout the study to characterize the binding between opsin and 11CR.

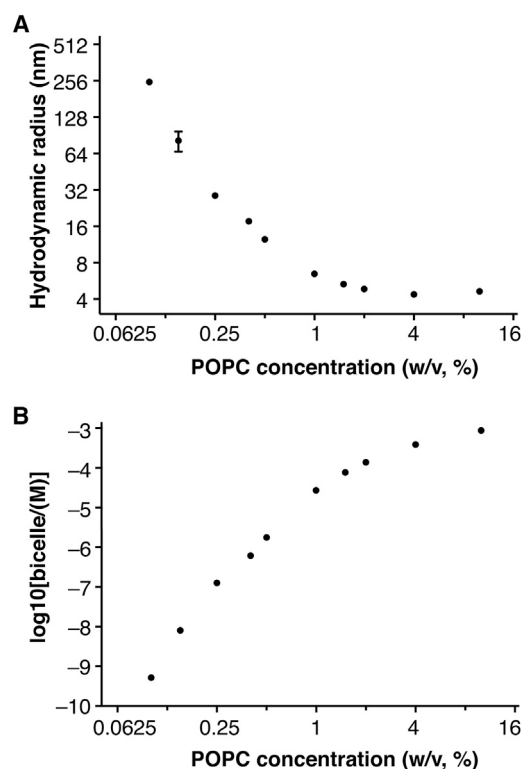

FIGURE 3 Dynamic light scattering (DLS) experiment to measure the hydrodynamic radius of POPC/CHAPS bicelles. (A) The hydrodynamic radii of bicelles change with the lipid concentration. (B) Bicelle concentration as a function of the lipid concentration. For 1% POPC/CHAPS, the hydrodynamic radius of bicelles is  $6.46 \pm 0.05$  nm and the concentration is 27  $\mu\text{M}$ .

### FRET-based assays to measure the kinetics of 11CR binding to opsin

In the dark-state Rho, the apoprotein and 11CR are linked together through a positively charged PSB linkage, which gives rise to its characteristic 500-nm peak. In the photoactivated Meta-II, the retinal absorption peak shifts from 500 to 380 nm. As ATR is released from the binding pocket, the ligand-free opsin shows no retinal peak. Taking advantage of the photochemistry of Rho, we employed two FRET-based assays to measure regeneration kinetics, both involving a fluorescent reporter as the energy donor and retinal as the acceptor (Fig. 4, *A–C*).

The first assay based on the intrinsic tryptophan (Trp) fluorescence of Rho has been described in Tian et al. (12) and Farrens and Khorana (13). In brief, Trp fluorescence can be quenched by 11CR in the dark-state Rho (Fig. 4 *A*), and by ATR even more efficiently in Meta-II Rho (13) (Fig. 4 *B*). Only when retinal dissociates from opsin is there no energy transfer between retinal and Trp (Fig. 4 *C*). The Trp-based assay indicates whether retinal is present in the ligand binding pocket.

The second assay utilizes an extrinsic fluorescent reporter Alexa488, which was attached to a Rho mutant at a

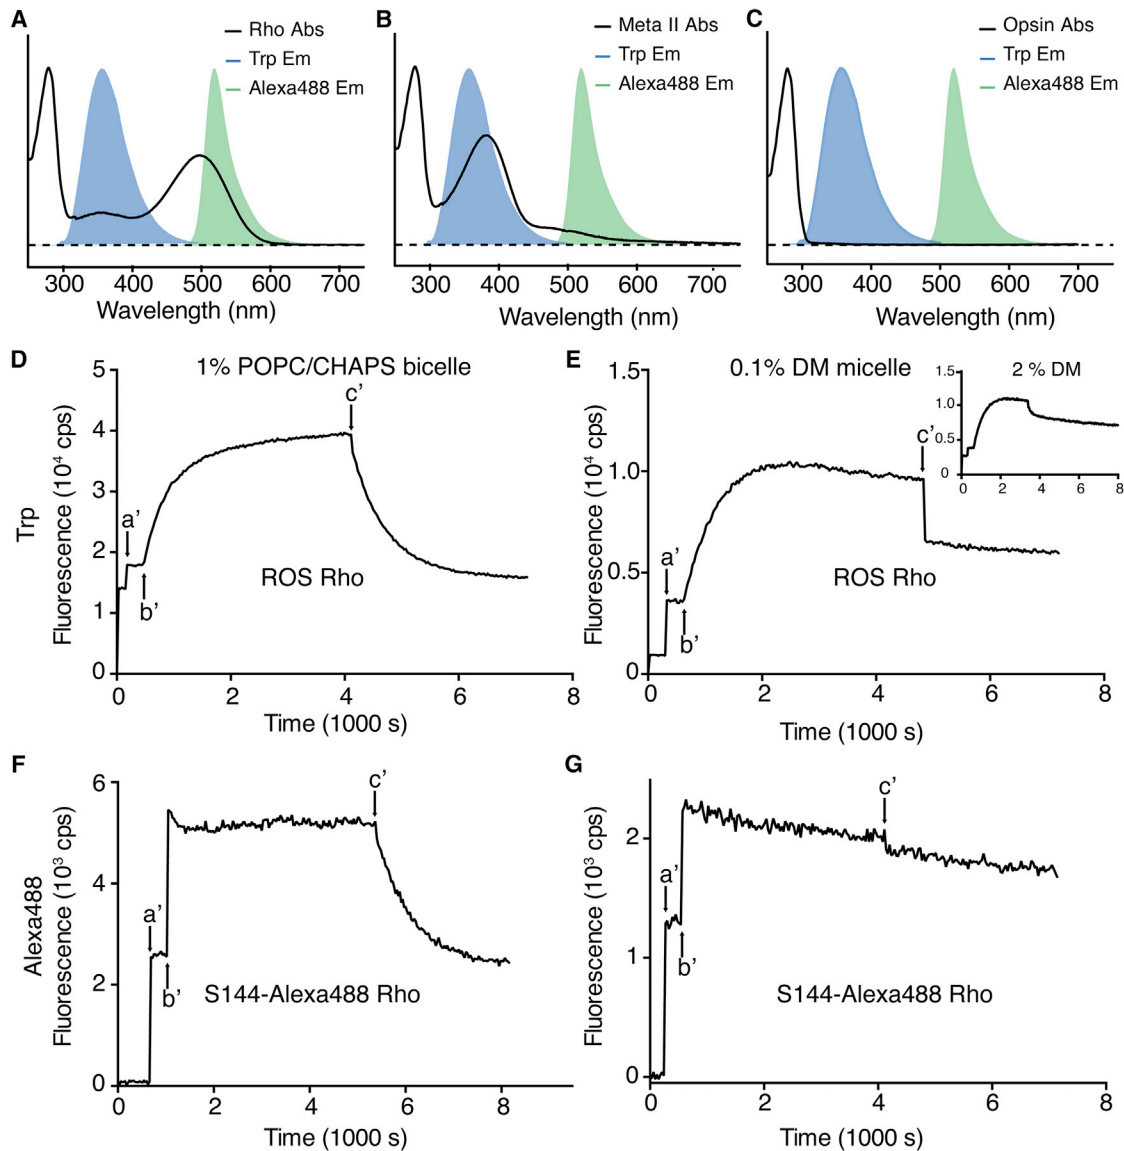

FIGURE 4 FRET-based measurement of Rho regeneration in different reconstitution systems. The absorption spectra (solid line) of Rho (A), Meta-II state Rho (B), and opsin (C) are overlaid with the fluorescence emission peaks of Trp (shade, maximum at 330 nm) and Alexa488 (shade, maximum at 520 nm). The intensities of the absorption peaks and fluorescence emission peaks are normalized. Fluorescence time course traces are presented in (D)–(G). In all cases, pigment (either wt Rho or S144-Alexa488 Rho) was added into the assay buffer at arrow a'. The sample was then photobleached at arrow b' to form the Meta-II state. After Meta-II decay was close to completion, the ligand 11CR was added to initiate pigment regeneration at arrow c'. (D) Purified ROS Rho reconstituted in bicelles (1% POPC/CHAPS). (E) ROS Rho in DM micelles (0.1% DM; inset: ROS Rho in 2% DM). (F) Purified S144azF mutant Rho labeled with an Alexa488 fluorophore (S144-Alexa488 Rho) in 1% POPC/CHAPS bicelles. The FRET efficiency between Alexa488 and dark-state Rho was calculated to be  $0.55 \pm 0.04$  (53). (G) S144-Alexa488 Rho in 0.1% DM micelles. To see this figure in color, go online.

genetically encoded azF residue in the second intracellular loop (S144-Alexa488 Rho) using a bioorthogonal azide-alkyne [3 + 2] cycloaddition reaction (10). The energy transfer between Alexa488 and retinal is critically dependent on the overlap of the 500-nm absorption peak of dark-state Rho and the Alexa488 emission spectrum (Fig. 4 A). Upon photoactivation of Rho, the deprotonation of PSB results in the instant loss of spectral overlap, and consequently a decrease in energy transfer efficiency (Fig. 4 B). Thus the Alexa488-based assay distinguishes

between a mature pigment with a PSB bond and a noncovalent complex of opsin and 11CR.

We reconstituted immunopurified wt Rho or S144-Alexa488 Rho into POPC/CHAPS bicelles (Fig. 4, D and F) or DM micelles (Fig. 4, E and G). We then photobleached the samples and allowed the resulting Meta-II photoproducts to decay to completion. For each of the samples reconstituted into bicelles (wt Rho or S144-Alexa488 Rho), after photobleaching and decay, the addition of exogenous 11CR initiated a robust monoexponential decrease in the Trp or

Alexa488 fluorescence signals (Fig. 4, D and F). Previously, we have shown that this monoexponential decay of fluorescence signal resulted from pigment regeneration, and that Alexa488-labeled Rho regenerated in POPC/CHAPS bicelles can be repeatedly photoactivated (10).

By contrast, the photobleached pigments could not be effectively regenerated in DM micelles at room temperature (Fig. 4, E and G), and we were not able to observe similar monoexponential fluorescence quenching for wt Rho or S144-Alexa488 Rho. For wt Rho in 0.1% DM (Fig. 4 E), a pronounced drop of Trp fluorescence signal occurred immediately after the addition of 11CR. We hypothesized that this fast-phase quenching reflected the nonspecific energy transfer between Trp and retinal that partitioned into the hydrophobic compartment of DM micelles (14), rather than the formation of mature pigment. We then reasoned that increasing the concentration of DM might reduce such nonspecific quenching. Indeed, in 2% DM the fast-phase quenching of Trp fluorescence by retinal was only 1/6 as much as in 0.1% DM (Fig. 4 E: inset, corrected for dilution and inner filter effects).

We further tested S144-Alexa488 Rho in 0.1% DM (Fig. 4 G). The monotonic decrease both before and after the addition of 11CR was different from what was observed in POPC/CHAPS bicelle buffer (Fig. 4 F). Because this assay unambiguously distinguishes between nonspecific quenching and real pigment regeneration, the result suggested opsin denaturation in DM micelles rather than real regeneration. There was no initial fast quenching phase in the Alexa488-based assay, supporting our conclusion that the quenching of Trp fluorescence in DM results from retinal that partitioned into micelles.

We also found that the DM-solubilized photobleached Rho, after transfer into POPC/CHAPS bicelle, could be partially regenerated at 28°C (Fig. S2). While at room temperature, opsin in 0.1% DM micelles cannot be regenerated by 11CR; when the temperature was lowered to 4°C, opsin can recombine with 11CR to form a mature pigment (Fig. S3). Taken together, these results show that the lipid bilayer environment of bicelles is important for the recombination of opsin and 11CR at room temperature.

### The kinetics of the recombination reaction between opsin and 11CR

To test whether the recombination reaction of Rho and 11CR in bicelles is bimolecular, we conducted the Trp-based FRET assay for purified wt Rho at various retinal concentrations. The pseudo first-order reaction rate ( $k_{\text{obs}}$ ) was linearly correlated with the nominal retinal concentration, demonstrating concordance with a second-order rate law within the tested range of retinal concentrations (Fig. 5 A).

In the regeneration experiment using 1% POPC/CHAPS, the ratio of bicelle, retinal, and Rho is  $\sim 140:8:1$ , and hence not every bicelle necessarily contains one molecule of

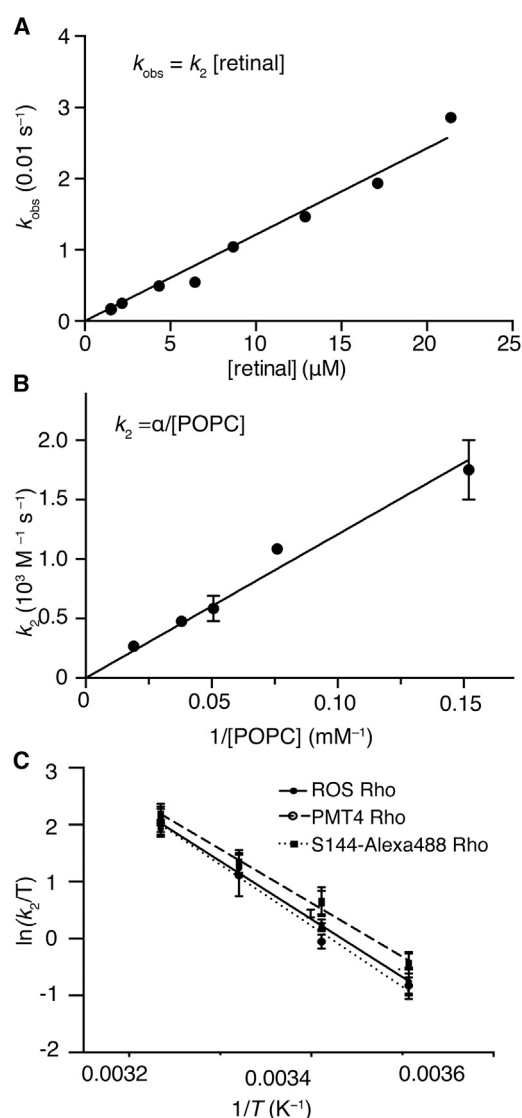

FIGURE 5 The kinetics of the recombination reaction between 11CR and opsin. (A) The  $k_{\text{obs}}$  of Rho regeneration was measured at various concentrations of 11CR (molar ratio of retinal to the receptor: 8.0 to 64). The slope of the plot corresponds to the  $k_2$  ( $(1.21 \pm 0.04) \times 10^3 \text{ M}^{-1} \text{ s}^{-1}$  at 28°C). (B) The measured  $k_2$  of Rho regeneration is inversely correlated with the concentrations of lipids ( $\alpha = (1.21 \pm 0.05) \times 10^4 \text{ s}^{-1}$ ). (C) Eyring plot for the second-order rate constants of three purified Rho samples: 1) Rho from bovine ROS (ROS Rho, Trp-based assay), 2) Rho heterologously expressed in HEK293F cells (PMT4 Rho, Trp-based assay), and 3) S144azF mutant Rho labeled with an Alexa488 fluorophore (S144-Alexa488 Rho, Alexa488-based assay).

retinal and one molecule of the receptor at the same time. A prerequisite of regeneration is that a molecule of retinal diffuses into a receptor-containing bicelle. Thus, we asked whether the measured kinetics reflects retinal entry into opsin binding pocket or rather a retinal diffusion among bicelles. We reasoned that when the ratio of retinal to bicelles decreases, it should take longer for retinal to find an opsin-containing bicelle. Thus the measured second-order rate constant ( $k_2$ ) should increase as the concentration of retinal

decreases. On the contrary, Fig. 5 A showed that  $k_2$  did not change with the concentration of retinal.

The DLS experiment (compare to Fig. 3) enabled us to estimate the concentration of bicelles as a function of lipids. If retinal diffusion were rate limiting, then when the concentration of retinal was lower than that of bicelles, and it exceeded the bicelle concentration, the chromophore binding rate should exhibit two phases. The concentration of retinal was 1.5–2  $\mu\text{M}$ . Therefore,  $k_2$  should be dramatically faster in 0.5% POPC/CHAPS (2  $\mu\text{M}$ ) than it is in 1% POPC/CHAPS (27  $\mu\text{M}$  bicelles). Instead, we found an inverse correlation between the  $k_2$  and the concentration of lipids (Fig. 5 B). A simple model can explain this inverse correlation: retinal molecules are practically solubilized in bicelles due to its high partition coefficient into lipids (15). Because retinal diffusion among bicelles is fast, the timescale for reaching equilibrium is negligible compared to that of ligand binding. Thus the effect of increasing lipids could be treated as a decrease in the effective concentration of retinal, even if the nominal concentration of retinal remains unchanged. Taken together, retinal diffusion among bicelles is not the rate-limiting step, and the measured kinetics in the bicelle system reflects the actual ligand-binding process.

The activation energy ( $E_{a,\text{on}}$ ) for 11CR binding in ROS Rho was  $20.8 \pm 0.9 \text{ kcal mol}^{-1}$  (Table S2). To our knowledge, the activation energy for 11CR diffusing in lipids has not been determined. When compared to an earlier study

that reported an  $E_a$  of  $8.8 \pm 0.3 \text{ kcal mol}^{-1}$  for a hydrophobic drug in POPC (16), 11CR binding with opsin requires an activation energy higher by  $12 \text{ kcal mol}^{-1}$ . This distinctly higher energy barrier suggests that the chromophore binding process measured here is rate limited by protein dynamics instead of 11CR diffusion.

Taken together, retinal diffusion among bicelles is not the rate-limiting step, and the measured kinetics in the bicelle system reflects the actual ligand-binding process.

### The reaction enthalpy of the recombination reaction between opsin and 11CR

We conducted an ITC experiment to measure the overall change in enthalpy ( $\Delta H^\circ$ ) between the two steady states. Opsin was directly purified into POPC/CHAPS bicelles. Three independent ITC measurements (Fig. 6, A–C) gave a stoichiometry of  $1.15 \pm 0.14$  for retinal binding to opsin, slightly greater than the expected 1.0. We obtained an average  $\Delta H^\circ$  of  $-21.6 \pm 1.3 \text{ kcal mol}^{-1}$  (Fig. 6 D). Due to the limitations of the sensitivity of the ITC instrument (17), we could not determine  $K_d$  from the shape of the titration curve.

In the ITC experiment, the ligand binding kinetics for opsin was comparable to the binding rates measured in the fluorescence quenching experiments. The reaction time for each injection increased as the concentration of

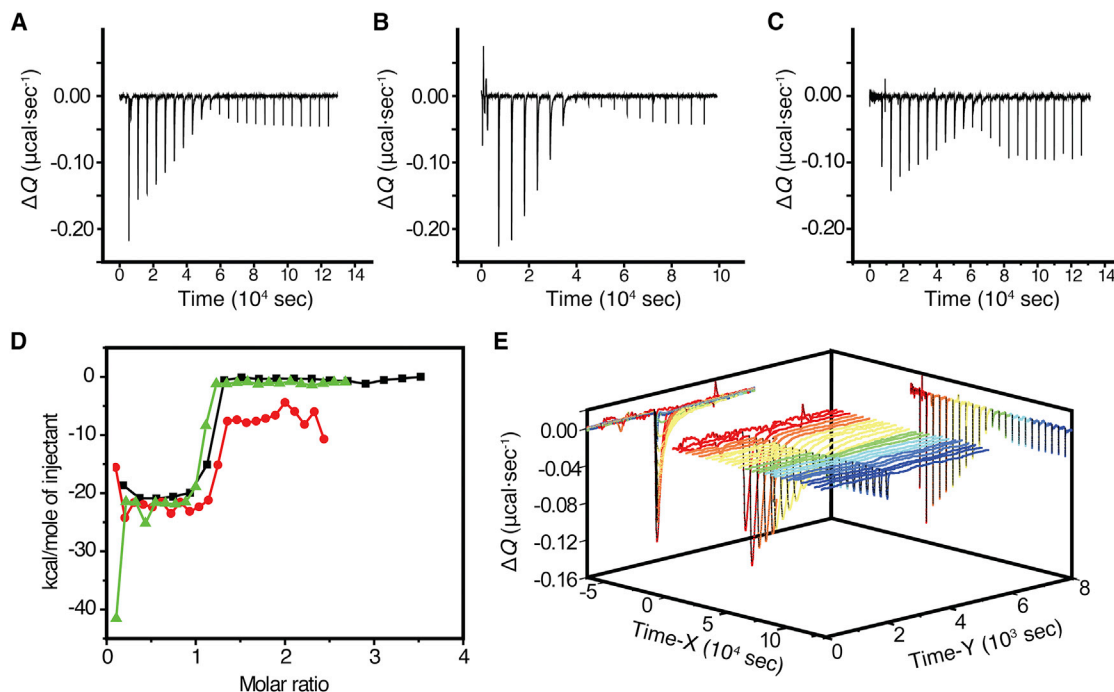

FIGURE 6 Reaction enthalpy for the binding of 11CR to opsin was determined from ITC experiments. (A–C) Raw ITC data plots from three independent experiments. The signals were corrected by subtracting the baseline. (D) The integrated reaction heat per mole of injectant versus the stoichiometry for three independent experiments (A, dots; B, squares, and C, triangles). The calculated  $\Delta H^\circ$  were  $-24.2 \pm 1.5 \text{ kcal mol}^{-1}$ ,  $-19.4 \pm 0.5 \text{ kcal mol}^{-1}$ , and  $-21.2 \pm 1.6 \text{ kcal mol}^{-1}$ , giving an average  $\Delta H^\circ$  of  $-21.6 \pm 1.3 \text{ kcal mol}^{-1}$ . (E) Given here is a 3D projection of a representative ITC experiment (C). Time X represents the entire time course of the experiment; time Y represents the time course of each injection.

ligand-free opsin decreased, and correspondingly the maximal differential power for each injection decreased with slower reaction kinetics. The differential power peaks after the titration point showed faster decay time with a negligible integrated area (Fig. 6 E), which were likely due to the mixing heat.

### The energy diagram of ligand binding in Rho

To describe an energy diagram for the ligand-receptor binding reaction with a single transition state, at least two of the following three parameters need to be determined: 1) the activation energy of the forward reaction  $\Delta^\ddagger X_{\text{on}}$  ( $X = G, H,$  or  $S$ ); 2) the activation energy of the reverse reaction  $\Delta^\ddagger X_{\text{off}}$ ; and/or 3) the energy difference between the products and the reactants of a particular state  $\Delta X^\circ$ . We derived the energy diagram based on the forward and reverse kinetic studies and the calorimetry experiment (Fig. 7 A. See the [Supporting Material](#) for the calculation). We assumed a modified biochemical standard state: 1% POPC/CHAPS bicelles in aqueous solution, at 28°C, pH 6.0, under ambient atmospheric pressure, and with the concentrations of reactants and products all at 1 M.

We present the complete enthalpy profile for the conversion of Rho in the photocycle (Fig. 7, B and C) based on our kinetic and calorimetric data and literature values (18). Because the *cis-trans* isomerization of retinal only has a small  $\Delta H^\circ$  of 0.15 kcal mol<sup>-1</sup> (19), the changes of enthalpy in the photocycle essentially reflect the conversion between photon energy and chemical energy stored in the ligand-receptor complex. The enthalpy of formation ( $\Delta H^\circ$ ) was  $-21.6 \pm 1.3$  kcal mol<sup>-1</sup>, and the entropic contribution ( $-T\Delta S^\circ$ ) was  $7.3 \pm 1.3$  kcal mol<sup>-1</sup>. Thus, the recombination reaction between 11CR and opsin is enthalpy driven.

## DISCUSSION

### Detergent micelles impede ligand binding in Rho

To analyze the binding of opsin and retinal, we need a reconstitution method to maintain the stability of opsin. Dodecylmaltoside (DM) micelles have been routinely employed in the purification of rhodopsin from recombinant sources (20). However, a previous report (21) and our results (Fig. 2 F) showed that detergent micelles are ineffective for stabilizing ligand-free opsin. By comparison, a bicelle system better mimics the native membrane environment and effectively stabilizes free opsin at its functional state (12,22,23). Compared with liposomes (24), bicelles are easier to prepare, show much less light scattering, and are more compatible with UV-Vis and fluorescence spectroscopy.

Based on the denaturation kinetics (compare to Fig. 3 F) at room temperature, there was >50% of opsin that remains functional within 2 h after photobleaching and could still

regenerate after being transferred into bicelles (Fig. S2). This observation implies that limitations of the detergent system were not simply a lack of thermal stability of opsin at room temperature. Another relevant piece of evidence is that Rho with an engineered N2C/D282C disulfide bond, even when solubilized in DM, can be readily regenerated with 11CR (25,26). This additional disulfide bond connects the N-terminus and the third extracellular loop but does not make contact with the chromophore binding pocket. It is improbable that the N2C/D282C mutation can dramatically alter the interaction between detergent and receptor. Therefore, the most plausible explanation is that DM might inhibit the binding of opsin and 11CR by modulating the conformation and energetics of opsin and that the disulfide bond alters the receptor conformational dynamics in a manner that offsets the effect of DM. In line with this notion, molecular dynamic simulation on an adenosine receptor suggested that DM and POPC gave slightly different receptor conformations (27). Two more experimental observations also support a crucial role of conformational energetics. First, the structure of opsin crystallized from a detergent with similar properties to DM (28) shows helix movements relative to the rhodopsin ground state that are characteristic of the light-activated state of rhodopsin (29,30). Second, opsin in 1% DM could be regenerated at 4°C (compare to Fig. S3). Although we cannot rule out the possibility that detergent may penetrate into the ligand binding site of the receptor, which has been suggested by structure studies (31) and molecular dynamics simulations (27), and thus may compete with 11CR binding, the relevance of such a scenario awaits direct experimental evidence. We propose that POPC/CHAPS bicelles stabilize a conformation of opsin that is similar to the rhodopsin ground state, which facilitates binding of 11CR. Our findings in the context of previously published literature should prompt a rethinking of the validity of measurements of GPCR activity in detergent systems.

Several studies on Rho regeneration in DM micelles have reported a large decrease in Trp fluorescence immediately upon the addition of 11CR, followed by a slower phase of fluorescence decrease (24,32,33). Our experiments comparing high (2%) and low (0.1%) concentration of DM (Fig. 4 E) suggested that this initial fast quenching resulted from retinal partitioning into DM micelles. The implication of this fast-phase quenching was discussed in greater detail in the [Supporting Material](#).

### Rho regeneration in bicelles exhibited single-phase kinetics

Electrophysiological studies suggested that the pigment regeneration process involves a transient noncovalent complex between retinal and opsin, which is followed by the formation of the mature pigment with the PSB bond (34). The formation of the noncovalent complex can be reversible, i.e.,



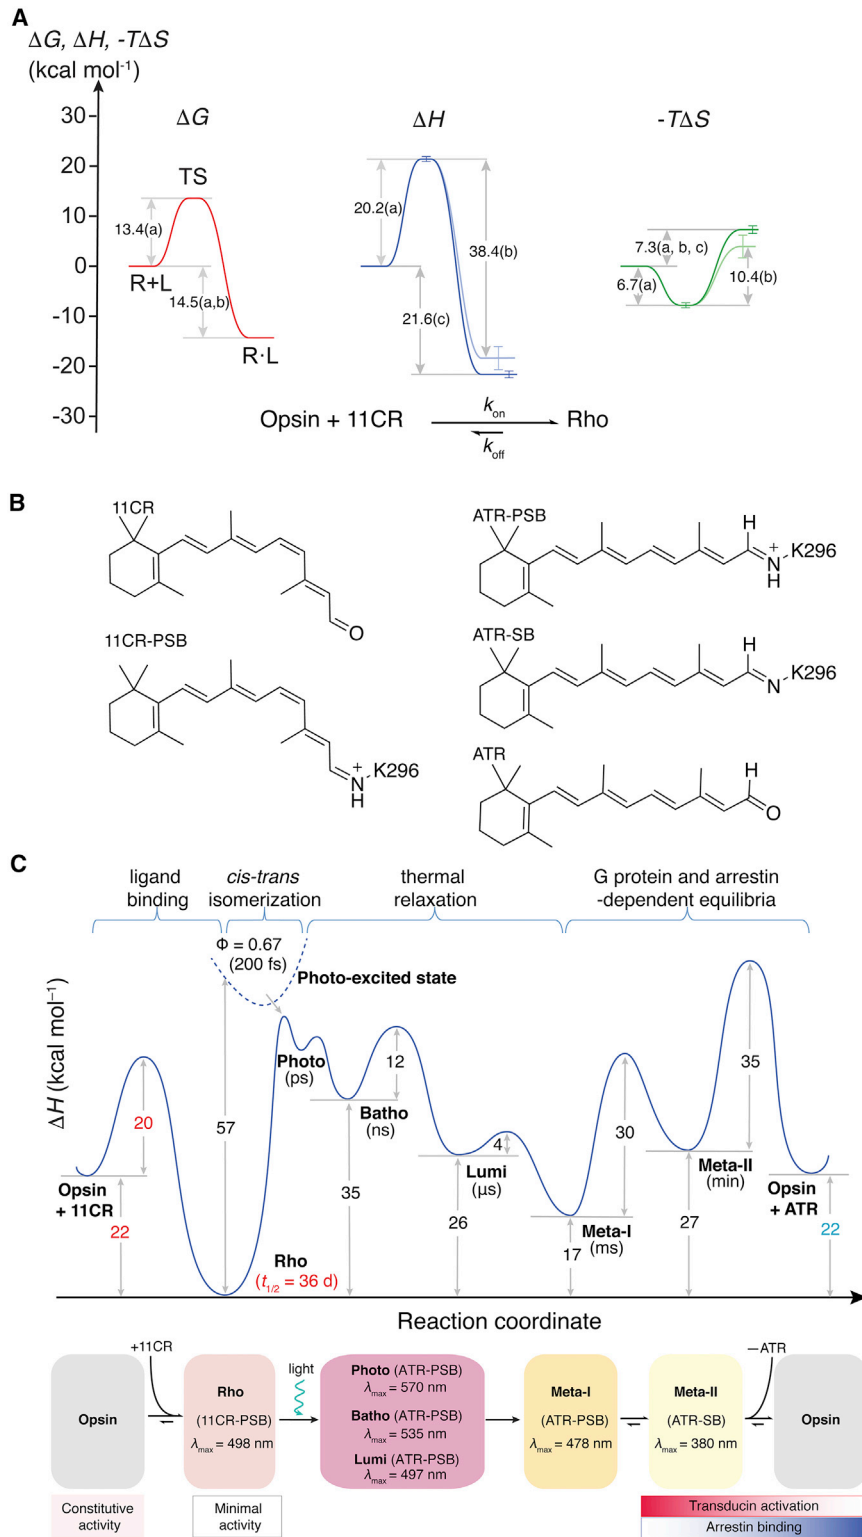

FIGURE 7 (A) Energy diagram for the binding reaction between opsin and 11CR. The letter next to each value indicates the experimental approach used to derive the value: (a) the kinetics of retinal entry (Fig. 5); (b) the chromophore exchange experiment (12); (c) the ITC experiment (Fig. 6). Note that here we highlighted the energy landscape derived from the calorimetric data in solid color. The retinal release energetics was shown in grey color. (B) The structures of the retinal-derived species in the photocycle of Rho. (Note that the retinylidene chromophores in Rho are 6-*s-cis*-isomers.) (C) The complete enthalpy profile of Rho regeneration and photoactivation. The lifetimes of the intermediate species are shown in the parentheses. The values determined or corrected by the present study are shown in red and turquoise, respectively.

there is a theoretical probability of retinal dissociation from the ligand binding pocket. In our earlier article, we have estimated the rate of spontaneous break of the PSB linkage to be as slow as  $10^{-7} \text{ s}^{-1}$  (12). Thus when the retinal binding

reaction is concerned, the second step can be treated as virtually irreversible.

The tryptophan fluorescence assay indicated whether the retinal resides in the binding pocket or somewhere else in

close proximity to opsin, whereas the Alexa488 fluorescence assay reflected overall kinetics from retinal entry to PSB bond formation. If there is significant reversible dissociation of retinal in the first step, the retinal binding rates measured by the Alexa488-based assay should be slower than the rates measured by the Trp-based assay. However, we found that these two assays gave statistically indistinguishable results (Fig. 5 C). Besides direct observations of a noncovalent complex, the presence of a noncovalent intermediate product should yield a nonlinear second-order kinetic plot (35). Nonetheless, we have not found any deviation from linearity of the overall reaction rate with the concentration of retinal. Thus the formation of the noncovalent intermediate and the formation of PSB bond are tightly coupled.

### The ITC experiment corroborates the kinetic measurements

The principles of microscopic reversibility and detailed balance indicate that the forward and the reverse reactions traverse through the same energy barrier. The fluorescence quenching studies provided a value for the energy barrier for the recombination reaction ( $\Delta^\ddagger G_{\text{on}}$ ). Previously we obtained the activation energy for the reverse reaction ( $\Delta^\ddagger G_{\text{off}}$ ) by measuring the kinetics of 11CR dissociation from Rho (12). However, because more than one molecular pathway might contribute to retinal dissociation, it is important to verify whether these two measured barriers actually correspond to the same transition state.

Due to the technical challenge of measuring the reaction enthalpy ( $\Delta H^\circ$ ) from the temperature dependence of the equilibrium constant ( $K_d$ ) and the associated change in free energy ( $\Delta G^\circ$ ) following van 't Hoff's relation, we chose to directly determine the enthalpy of formation by ITC. Ordinarily, opsin rapidly denatures in detergent micelles. Here the ITC experiment for ligand binding in Rho was made possible by utilizing POPC/CHAPS bicelles to stabilize the apoprotein over the timescale of the experiment (15~30 h). The principle of microscopic reversibility predicts that the difference between the activation enthalpy of the forward and reverse reactions should have the same value as the enthalpy of formation ( $\Delta^\ddagger H_{\text{on}} - \Delta^\ddagger H_{\text{off}} = \Delta H^\circ$ ). Indeed, the kinetics experiments ( $\Delta^\ddagger H_{\text{on}} - \Delta^\ddagger H_{\text{off}} = -18.2 \pm 4.5 \text{ kcal mol}^{-1}$ ) and ITC experiment ( $\Delta H^\circ = -21.6 \pm 1.3 \text{ kcal mol}^{-1}$ ) yielded consistent results; within the stated errors these two values are statistically indistinguishable. Therefore, the calorimetric measurement substantiated the accuracy of the kinetics data. More importantly, the ITC result supports our analysis that the direct breaking of the PSB linkage, rather than thermal isomerization of 11CR to ATR, is the primary pathway for the spontaneous dissociation of 11CR from Rho (12).

The ITC result was used to derive a complete enthalpy profile of Rho regeneration and photoactivation (Fig. 7 C). In our diagram, the change of enthalpy of (ATR + opsin) relative to

Rho (+22 kcal mol<sup>-1</sup> at pH 6.0) differs from an earlier study (+12 kcal mol<sup>-1</sup> at pH 5.4) (18). We contend that the ITC experiment in this study gives a more accurate value because it directly measures the binding enthalpy and does not rely on complicated thermodynamic cycles involving hydroxylamine-dependent reaction steps.

### The dissociation constant of Rho in disc membrane

Our kinetics measurement was done in 1% (w/v) of POPC (13 mM), whereas the concentration of lipids in the ROS disc membrane is ~150 mM (36). The inverse correlation between regeneration kinetics and lipid concentration (Fig. 5 B) predicts that the  $k_2$  in ROS would be ~8.7% of that in 1% POPC/CHAPS (60 M<sup>-1</sup> s<sup>-1</sup> at 25°C or 235 M<sup>-1</sup> s<sup>-1</sup> at 37°C). This value is close to the regeneration rate measured in ROS membrane (3.0 × 10<sup>2</sup> to 4.0 × 10<sup>2</sup> M<sup>-1</sup> s<sup>-1</sup> at 35°C) (37). To estimate the dissociation constant between opsin and 11CR in the dark-adapted retina, we assumed that Rho regeneration in ROS membrane has a  $k_2$  of 300 M<sup>-1</sup> s<sup>-1</sup> at 37°C. Based on the measured dissociation rate ( $k_{\text{off}}$  of 2.2 × 10<sup>-7</sup> s<sup>-1</sup>), the dissociation constant ( $K_d = k_{\text{off}}/k_2$ ) for the 11CR-opsin covalent complex (i.e., Rho) is 0.73 nM at 37°C in the ROS membrane. Note that the dissociation constants in 1% POPC/CHAPS at 25 and 37°C were 25 and 82 pM, respectively (compare to Supporting Material). In a previous study of 11CR binding to opsin using surface plasmon resonance (SPR), a dissociation constant of 130 nM has been inferred (38). However, we contend that estimate because the binding times in the surface plasmon resonance study were orders-of-magnitude too short to ensure equilibration.

Previous psychophysical studies on dark adaptation showed that the exponential phase of Rho regeneration in human retina has a pseudo-first order  $k_{\text{obs}}$  of 1.5 × 10<sup>-3</sup> s<sup>-1</sup>, or 0.09 min<sup>-1</sup> (6). Then the concentration of intracellular free 11CR is calculated to be 5 μM ([11CR] =  $k_{\text{obs}}/k_2$ ), only a tiny fraction (0.1%) of the pigment content in rods (4.6 mM) (39). This value is consistent with the observation that Rho regeneration at high photobleaching level is rate limited by the diffusion of 11CR through retinal pigment epithelium cells (6). The estimated concentration of 11CR in the ROS is 6800-times larger than the dissociation constant. Following Le Chatelier's principle, the concentration of 11CR is sufficient to drive the opsinRho equilibrium far to the side of Rho, and the concentration of opsin is only ~0.015% of Rho (12).

### Comparison of ligand binding in Rho and other GPCRs

Among GPCRs, visual pigments, including Rho, are unique in that they form covalent bonds with their inverse agonist (11CR) and agonist (ATR) ligands in the receptor active

site. Protease-activated receptors are somewhat similar in that they encompass a tethered-ligand as a part of their N-terminal tails that is released upon the action of a serine protease. However, most other GPCRs, if not all, are activated by endogenous diffusible agonist ligands, or inhibited by exogenously added ligand drugs. One might assume that the covalent linkage between opsin and 11CR would dramatically alter the energetics of ligand binding in Rho as compared with ligand binding in other GPCRs.

Relevant literature values are available for three high-affinity ligands in complex with  $\beta$ -adrenergic receptor:  $\beta$ -adrenergic receptor ( $\beta$ AR)-carazolol (40),  $\beta$ AR-iodopindolol (41), and  $\beta$ AR-BI-167107 (42) (Table 1). We compared the values for the energetics of ligand binding to opsin with the published values for  $\beta$ AR. Surprisingly, the  $K_d$  values and the overall change of free energy ( $\Delta G^\circ$ ) for the ligand-binding reaction for the two systems are on the same order of magnitude. Despite similar  $\Delta G^\circ$ , the change of enthalpy ( $\Delta H^\circ$ ) is much higher for Rho, possibly due to the formation of the SB bond, which provides an example of enthalpy-entropy compensation in ligand-receptor binding (43). This comparison shows that the underlying energetics that defines high-affinity ligand-receptor interactions might be conserved among visual pigments and GPCRs utilizing diffusible ligands.

The role of the PSB linkage in Rho is to lock retinal inside the ligand-binding pocket near to the center of the receptor. The buried binding pocket, in turn, protects the PSB from hydrolysis. Thus, Rho is evolved to increase the lifetime of the inactive ligand-receptor complex. The energy barrier for ligand dissociation ( $\Delta^\ddagger G_{\text{off}}$ ) in Rho is notably higher than in  $\beta$ AR that has no endogenous inverse agonist. The energy barrier for ligand binding ( $\Delta^\ddagger G_{\text{on}}$ ) is correspondingly higher in Rho, explaining the slow ligand-binding kinetics for Rho compared with other GPCRs.

Ligand binding in Rho was proposed to proceed through an intramembranous pathway (44–46), whereas in the case of the  $\beta$ AR, it occurs through the aqueous exposed extracellular surface (47). The higher  $\Delta^\ddagger G_{\text{on}}$  for Rho suggests

that retinal entry into the ligand-binding pocket of opsin involves greater conformational change, as inferred from the structures. The viscosity of lipid bilayer also contributes to the free energy barrier of ligand binding to GPCRs in an additive fashion (48). Therefore, the difference in  $\Delta^\ddagger G_{\text{on}}$  between opsin and  $\beta$ AR might be correlated to the distinct ligand binding modes utilized by the two receptors.

GPCRs constitute the largest category of small-molecule drug targets (49). Pharmacologists are accustomed to using the equilibrium dissociation constant ( $K_d$ ) as a guiding principle for drug design. Recently, there is increasing appreciation in the GPCR pharmacology field for the relevance of receptor residence time ( $= 1/k_{\text{off}}$ ) of ligand (50), and hence a growing need to develop new assays for quantifying ligand binding and dissociation kinetics. In this study, we harnessed the unique photochemistry of Rho to develop energy transfer-based kinetic assays. Although most GPCRs do not utilize chromophores as ligands, the rapid development of fluorescent ligands for GPCRs (51), combined with our site-specific labeling strategy, may facilitate the study of ligand binding kinetics for a variety of receptors.

## CONCLUSIONS

We present here a comprehensive analysis of the kinetics and thermodynamics of the recombination reaction between opsin and 11CR to form the mature visual pigment, Rho. We found that the lipid bilayer environment is important for ligand binding in Rho. We also show that despite the covalent linkage between 11CR and opsin in Rho, the equilibrium dissociation constant of 11CR for opsin is similar to affinities of diffusible ligands for GPCRs. The higher energy barrier for ligand binding in Rho underlies the slower ligand binding and dissociation kinetics for Rho compared with other GPCRs. We suggest that the energy diagram derived in this study provides a useful guide for interpreting ligand binding modes for other GPCRs.

**TABLE 1** The Kinetic and Thermodynamic Parameters for  $\beta$ AR and Rho with Their Ligands at 25°C

| Receptor                                                   | $\beta_2$ AR           | $\beta_2$ AR           | $\beta$ AR                | Rho                  |
|------------------------------------------------------------|------------------------|------------------------|---------------------------|----------------------|
| Ligand                                                     | BI-167107 <sup>a</sup> | Carazolol <sup>b</sup> | Iodopindolol <sup>c</sup> | 11CR <sup>d</sup>    |
| $k_2$ ( $\text{M}^{-1} \text{s}^{-1}$ )                    | $7.6 \times 10^4$      | $>6.3 \times 10^4$     | $8 \times 10^6$           | $6.9 \times 10^2$    |
| $k_{\text{off}}$ ( $\text{s}^{-1}$ )                       | $6.4 \times 10^{-6}$   | $6.3 \times 10^{-6}$   | $4.2 \times 10^{-4}$      | $1.7 \times 10^{-8}$ |
| $K_d$ (pM)                                                 | 84                     | <100                   | 53                        | 25 <sup>e</sup>      |
| $\Delta G^\circ$ (kcal mol <sup>-1</sup> )                 | -13.7                  | <-13.6                 | -14.1 $\pm$ 0.1           | -14.4 $\pm$ 0.04     |
| $\Delta H^\circ$ (kcal mol <sup>-1</sup> )                 | —                      | —                      | -9.3 $\pm$ 0.1            | -21.6 $\pm$ 1.3      |
| $-T\Delta S^\circ$ (kcal mol <sup>-1</sup> )               | —                      | —                      | -4.7 $\pm$ 0.1            | 7.2 $\pm$ 1.3        |
| $\Delta^\ddagger G_{\text{on}}$ (kcal mol <sup>-1</sup> )  | 10.8                   | >10.9                  | 8.0                       | 13.5                 |
| $\Delta^\ddagger G_{\text{off}}$ (kcal mol <sup>-1</sup> ) | 24.5                   | 24.5                   | 22.0                      | 27.9                 |

<sup>a</sup> $K_d$  and  $k_{\text{off}}$  taken from Rasmussen et al. (42); other values are calculated based on the transition state theory.

<sup>b</sup> $K_d$  and  $k_{\text{off}}$  taken from Rosenbaum et al. (40); other values are calculated based on the transition state theory.

<sup>c</sup> $k_2$ ,  $k_{\text{off}}$ ,  $K_d$ ,  $\Delta G^\circ$ , and  $\Delta H^\circ$  taken from Contreras et al. (52); other values are calculated based on the transition state theory.

<sup>d</sup>Calculated for 25°C from the Eyring plot (Fig. 4 C), so the values are different from the values indicated in Fig. 7 A.

<sup>e</sup>Calculated as  $K_d = k_{\text{off}}/k_2$ .

## SUPPORTING MATERIAL

Supporting Materials and Methods, Supporting Data, three figures, and two tables are available at [http://www.biophysj.org/biophysj/supplemental/S0006-3495\(17\)30575-1](http://www.biophysj.org/biophysj/supplemental/S0006-3495(17)30575-1).

## AUTHOR CONTRIBUTIONS

H.T., T.P.S., and T.H. designed the study, analyzed the results, and wrote the manuscript. H.T. and T.H. conducted the experiments.

## ACKNOWLEDGMENTS

We thank Prof. Klaus Peter Hofmann for discussions that inspired a part of this work. We thank Prof. King-Wai Yau for discussions of this work.

We acknowledge the generous support from the Crowley Family Fund and the Danica Foundation. This work has also been generously supported by an International Research Alliance with Prof. Thue W. Schwartz at The Novo Nordisk Foundation Center for Basic Metabolic Research (<http://www.metabol.ku.dk>) through an unconditional grant from the Novo Nordisk Foundation to the University of Copenhagen. We also acknowledge support from National Institutes of Health (NIH) grant R01 EY012049 (T.P.S. and T.H.), as well as the Tri-Institutional Training Program in Chemical Biology in supporting H.T.

## REFERENCES

- Wald, G. 1968. Molecular basis of visual excitation. *Science*. 162:230–239.
- Schertler, G. F., C. Villa, and R. Henderson. 1993. Projection structure of rhodopsin. *Nature*. 362:770–772.
- Palczewski, K., T. Kumasaka, ..., M. Miyano. 2000. Crystal structure of rhodopsin: a G protein-coupled receptor. *Science*. 289:739–745.
- Menon, S. T., M. Han, and T. P. Sakmar. 2001. Rhodopsin: structural basis of molecular physiology. *Physiol. Rev.* 81:1659–1688.
- Sakmar, T. P., R. R. Franke, and H. G. Khorana. 1989. Glutamic acid-113 serves as the retinylidene Schiff base counterion in bovine rhodopsin. *Proc. Natl. Acad. Sci. USA*. 86:8309–8313.
- Lamb, T. D., and E. N. Pugh, Jr. 2004. Dark adaptation and the retinoid cycle of vision. *Prog. Retin. Eye Res.* 23:307–380.
- Ye, S., T. Huber, ..., T. P. Sakmar. 2009. FTIR analysis of GPCR activation using azido probes. *Nat. Chem. Biol.* 5:397–399.
- Tian, H., T. P. Sakmar, and T. Huber. 2013. Site-specific labeling of genetically encoded azido groups for multicolor, single-molecule fluorescence imaging of GPCRs. *Methods Cell Biol.* 117:267–303.
- Huber, T., S. Naganathan, ..., T. P. Sakmar. 2013. Unnatural amino acid mutagenesis of GPCRs using amber codon suppression and bio-orthogonal labeling. *Methods Enzymol.* 520:281–305.
- Tian, H., S. Naganathan, ..., T. Huber. 2014. Bioorthogonal fluorescent labeling of functional G-protein-coupled receptors. *ChemBioChem*. 15:1820–1829.
- Tian, H., A. Fürstenberg, and T. Huber. 2017. Labeling and single-molecule methods to monitor G protein-coupled receptor dynamics. *Chem. Rev.* 117:186–245.
- Tian, H., T. P. Sakmar, and T. Huber. 2017. Measurement of slow spontaneous release of 11-*cis*-retinal from rhodopsin. *Biophys. J.* 112:153–161.
- Farrens, D. L., and H. G. Khorana. 1995. Structure and function in rhodopsin. Measurement of the rate of metarhodopsin II decay by fluorescence spectroscopy. *J. Biol. Chem.* 270:5073–5076.
- McCaslin, D. R., and C. Tanford. 1981. Effects of detergent micelles on the recombination reaction of opsin and 11-*cis*-retinal. *Biochemistry*. 20:5207–5212.
- Frederiksen, R., N. P. Boyer, ..., M. C. Cornwall. 2012. Low aqueous solubility of 11-*cis*-retinal limits the rate of pigment formation and dark adaptation in salamander rods. *J. Gen. Physiol.* 139:493–505.
- Gaede, H. C., and K. Gawrisch. 2003. Lateral diffusion rates of lipid, water, and a hydrophobic drug in a multilamellar liposome. *Biophys. J.* 85:1734–1740.
- Pierce, M. M., C. S. Raman, and B. T. Nall. 1999. Isothermal titration calorimetry of protein-protein interactions. *Methods*. 19:213–221.
- Cooper, A. 1981. Rhodopsin photoenergetics: lumirhodopsin and the complete energy profile. *FEBS Lett.* 123:324–326.
- Hubbard, R. 1966. The stereoisomerization of 11-*cis*-retinal. *J. Biol. Chem.* 241:1814–1818.
- Karnik, S. S., T. P. Sakmar, ..., H. G. Khorana. 1988. Cysteine residues 110 and 187 are essential for the formation of correct structure in bovine rhodopsin. *Proc. Natl. Acad. Sci. USA*. 85:8459–8463.
- De Grip, W. J. 1982. Thermal stability of rhodopsin and opsin in some novel detergents. *Methods Enzymol.* 81:256–265.
- McKibbin, C., N. A. Farmer, ..., P. J. Booth. 2007. Opsin stability and folding: modulation by phospholipid bicelles. *J. Mol. Biol.* 374:1319–1332.
- Reeves, P. J., J. Hwa, and H. G. Khorana. 1999. Structure and function in rhodopsin: kinetic studies of retinal binding to purified opsin mutants in defined phospholipid-detergent mixtures serve as probes of the retinal binding pocket. *Proc. Natl. Acad. Sci. USA*. 96:1927–1931.
- Sánchez-Martín, M. J., E. Ramon, ..., P. Garriga. 2013. Improved conformational stability of the visual G protein-coupled receptor rhodopsin by specific interaction with docosahexaenoic acid phospholipid. *ChemBioChem*. 14:639–644.
- Xie, G., A. K. Gross, and D. D. Oprian. 2003. An opsin mutant with increased thermal stability. *Biochemistry*. 42:1995–2001.
- Piechnick, R., E. Ritter, ..., M. Heck. 2012. Effect of channel mutations on the uptake and release of the retinal ligand in opsin. *Proc. Natl. Acad. Sci. USA*. 109:5247–5252.
- Lee, S., A. Mao, ..., N. Vaidehi. 2016. How do short chain nonionic detergents destabilize G-protein-coupled receptors? *J. Am. Chem. Soc.* 138:15425–15433.
- Park, J. H., P. Scheerer, ..., O. P. Ernst. 2008. Crystal structure of the ligand-free G-protein-coupled receptor opsin. *Nature*. 454:183–187.
- Sheikh, S. P., T. A. Zvyaga, ..., H. R. Bourne. 1996. Rhodopsin activation blocked by metal-ion-binding sites linking transmembrane helices C and F. *Nature*. 383:347–350.
- Farrens, D. L., C. Altenbach, ..., H. G. Khorana. 1996. Requirement of rigid-body motion of transmembrane helices for light activation of rhodopsin. *Science*. 274:768–770.
- Szczepek, M., F. Beyrière, ..., P. Scheerer. 2014. Crystal structure of a common GPCR-binding interface for G protein and arrestin. *Nat. Commun.* 5:4801.
- Heck, M., S. A. Schädel, ..., K. P. Hofmann. 2003. Secondary binding sites of retinoids in opsin: characterization and role in regeneration. *Vision Res.* 43:3003–3010.
- Schädel, S. A., M. Heck, ..., K. P. Hofmann. 2003. Ligand channeling within a G-protein-coupled receptor. The entry and exit of retinals in native opsin. *J. Biol. Chem.* 278:24896–24903.
- Kefalov, V. J., R. K. Crouch, and M. C. Cornwall. 2001. Role of non-covalent binding of 11-*cis*-retinal to opsin in dark adaptation of rod and cone photoreceptors. *Neuron*. 29:749–755.
- Henselman, R. A., and M. A. Cusanovich. 1976. Characterization of the recombination reaction of rhodopsin. *Biochemistry*. 15:5321–5325.
- Liebman, P. A., W. S. Jagger, ..., F. G. Bargon. 1974. Membrane structure changes in rod outer segments associated with rhodopsin bleaching. *Nature*. 251:31–36.

37. Kawaguchi, T., T. Hamanaka, and Y. Kito. 1986. Kinetic study of transfer of 11-*cis*-retinal between rod outer segment membranes using regeneration of rhodopsin. *Biophys. Chem.* 24:5–12.
38. Bieri, C., O. P. Ernst, ..., H. Vogel. 1999. Micropatterned immobilization of a G protein-coupled receptor and direct detection of G protein activation. *Nat. Biotechnol.* 17:1105–1108.
39. Nickell, S., P. S. Park, ..., K. Palczewski. 2007. Three-dimensional architecture of murine rod outer segments determined by cryoelectron tomography. *J. Cell Biol.* 177:917–925.
40. Rosenbaum, D. M., V. Cherezov, ..., B. K. Kobilka. 2007. GPCR engineering yields high-resolution structural insights into  $\beta$ 2-adrenergic receptor function. *Science*. 318:1266–1273.
41. Contreras, M. L., B. B. Wolfe, and P. B. Molinoff. 1986. Thermodynamic properties of agonist interactions with the  $\beta$ -adrenergic receptor-coupled adenylate cyclase system. II. Agonist binding to soluble  $\beta$ -adrenergic receptors. *J. Pharmacol. Exp. Ther.* 237:165–172.
42. Rasmussen, S. G., H. J. Choi, ..., B. K. Kobilka. 2011. Structure of a nanobody-stabilized active state of the  $\beta$ 2 adrenoceptor. *Nature*. 469:175–180.
43. Borea, P. A., A. Dalpiaz, ..., G. Gilli. 2000. Can thermodynamic measurements of receptor binding yield information on drug affinity and efficacy? *Biochem. Pharmacol.* 60:1549–1556.
44. Huber, T., K. M. Gunnison, ..., T. P. Sakmar. 2005. Identification of the primary entry site in visual rhodopsins: an intramembranous pathway from mutagenesis and MD simulations. *Biophys. J.* 88:507a–508a.
45. Wang, T., and Y. Duan. 2007. Chromophore channeling in the G-protein coupled receptor rhodopsin. *J. Am. Chem. Soc.* 129:6970–6971.
46. Hildebrand, P. W., P. Scheerer, ..., M. Heck. 2009. A ligand channel through the G protein coupled receptor opsin. *PLoS One*. 4:e4382.
47. Venkatakrishnan, A. J., X. Deupi, ..., M. M. Babu. 2013. Molecular signatures of G-protein-coupled receptors. *Nature*. 494:185–194.
48. Lee, A. G. 1991. Lipids and their effects on membrane proteins: evidence against a role for fluidity. *Prog. Lipid Res.* 30:323–348.
49. Santos, R., O. Ursu, ..., J. P. Overington. 2017. A comprehensive map of molecular drug targets. *Nat. Rev. Drug Discov.* 16:19–34.
50. Guo, D., L. H. Heitman, and A. P. Ijzerman. 2015. The role of target binding kinetics in drug discovery. *ChemMedChem*. 10:1793–1796.
51. Stoddart, L. A., L. E. Kilpatrick, ..., S. J. Hill. 2015. Probing the pharmacology of G protein-coupled receptors with fluorescent ligands. *Neuropharmacology*. 98:48–57.
52. Contreras, M. L., B. B. Wolfe, and P. B. Molinoff. 1986. Thermodynamic properties of agonist interactions with the  $\beta$ -adrenergic receptor-coupled adenylate cyclase system. I. High- and low-affinity states of agonist binding to membrane-bound  $\beta$ -adrenergic receptors. *J. Pharmacol. Exp. Ther.* 237:154–164.
53. Tian, H., T. P. Sakmar, and T. Huber. 2015. Micelle-enhanced bio-orthogonal labeling of genetically encoded azido groups on the lipid-embedded surface of a GPCR. *ChemBioChem*. 16:1314–1322.

**Biophysical Journal, Volume 113**

**Supplemental Information**

**The Energetics of Chromophore Binding in the Visual Photoreceptor  
Rhodopsin**

**He Tian, Thomas P. Sakmar, and Thomas Huber**

## SUPPLEMENTAL EXPERIMENTAL PROCEDURES

### Preparation of the POPC/CHAPS bicelles buffer and dynamic light scattering characterization

The POPC lipids were dissolved in 20% (weight/volume) CHAPS solution at 1:1 POPC(weight)-to-CHAPS (weight) ratio. The solution was frozen in liquid nitrogen, then thawed and vortexed repeatedly to facilitate the dissolving of POPC. The dissolved POPC/CHAPS solution was diluted with water to a final concentration of 10% (w/v). Here we refer to the concentration of the POPC/CHAPS bicelle buffer in term of the (w/v) percentage. For example, 1% POPC/CHAPS contain 10 mg/mLPOPC and 10 mg/mL CHAPS. Note that the concentration of amphiphiles (POPC and CHAPS) is twice that value of the percentage. The 10% stock solution was kept at  $-20^{\circ}\text{C}$  and thawed prior to use. For dynamic light scattering experiment, 10% POPC/CHAPS stock solution was freshly diluted with Buffer A (25 mM MES, 25 mM HEPES, 125 mM KCl, 12.5 mM KOH, pH 6.0). Before the dilution, the POPC/CHAPS stock solution and the buffer were filtered with inorganic membrane filter (Whatman, Anotop 10, 0.02  $\mu\text{m}$  pore size, 10 mm diameter) to remove any contamination of particles. Samples were added into a 384-well plate (60  $\mu\text{L}$  each well, Greiner, black, clear bottom), and then the plate was sealed on top with an Oracal soft PVC film (Orafol) to prevent evaporation. All the samples in this DLS experiment was measured in triplicate at  $28^{\circ}\text{C}$ , on a DynaPro Plate Reader II (Wyatt).

### Immunoaffinity Purification of Rho from ROS membrane.

All the procedures involving dark-state Rho were performed in a dark room under dim red light. Native rod outer segment (ROS) membranes were isolated from frozen bovine retinas (W. L. Lawson Co., Lincoln, NE) as described before (1, 2). The 1D4-Sepharose 2B resin was prepared from 1D4 monoclonal antibody and cyanogen bromide-activated Sepharose 2B as described before (3, 4).

The detailed protocol for immunopurifying ROS Rho has been described in full details in the preceding report (5). Briefly, bovine ROS were lysed with the solubilization buffer (1% (w/v) DM, 50 mM HEPES or Tris-HCl, pH 6.8, 100 mM NaCl, 1 mM  $\text{CaCl}_2$  with Complete EDTA-free Protease Inhibitor Cocktail, Roche). The lysate was cleared by centrifugation at  $100,000\times g$ . The supernatant was mixed with 1D4-Sepharose-2B resin and incubated overnight at  $4^{\circ}\text{C}$ . The resin was transferred in a centrifugal filter unit with a 0.45- $\mu\text{m}$  microporous hydrophilic PVDF membrane (Ultrafree-CL; Millipore) to enable efficient removal of buffer. The resin was first washed with Wash Buffer (DPBS containing 0.1% (w/v) DM) for three times (30 minutes incubation each time), and then with a low-salt buffer (0.1% (w/v) DM, 2 mM phosphate buffer, pH 6.0). The receptor was eluted with low-salt elution buffer (0.1% (w/v) DM, 2 mM phosphate buffer, pH 6.0, 0.33 mg/mL nonapeptide (sequence TETSQVAPA)). Then 150 mM salt was supplemented into the sample to restore the ionic strength. The preparation of ROS membranes were aliquoted and stored at  $-80^{\circ}\text{C}$ .

The purified product was characterized by UV-Vis spectroscopy. The dark-state absorption spectrum of Rho was recorded in a 50- $\mu\text{L}$  micro-cuvette with 10-mm path length on a Lambda-800 spectrophotometer (PerkinElmer Life Sciences). To acquire the absorption spectra of the photobleached Rho, the sample was supplemented with  $\text{NH}_2\text{OH}$  and irradiated for 30 seconds with a 335-mW 505-nm LED light source (Thorlabs) placed on top of the cuvette.

### Preparation of Alexa488-labeled Rho

The expression of azF-tagged Rho was done using HEK293F cells (Invitrogen). Before transfection, the cell culture was resuspended at a density of  $10^6$  cells/mL in a 30-mL culture supplemented with 1 mM azF. For amber codon suppression, HEK293F suspension cells were transfected with a mixture of plasmid DNAs (38.6  $\mu\text{g}$  in total, 18.4  $\mu\text{g}$  of pMT4.Rho containing the amber codon, 18.4  $\mu\text{g}$  of pSVB.Yam, and 1.84  $\mu\text{g}$  pcDNA.RS) that have been described before (6). To maximize the yield of azF-Rho mutants, the cells were harvested 96 hours post-transfection. The cells were then resuspended at a density of  $10^7$  cells/mL in DPBS and regenerated by overnight incubation with 5  $\mu\text{M}$  11CR at  $4^{\circ}\text{C}$  (7). The regenerated cells were centrifuged and frozen at  $-20^{\circ}\text{C}$  (wrapped light-tight in aluminum foil).

To label the azF-tagged Rho, the 11CR-regenerated cells were lysed with 1% DM, and the cleared lysate was incubated overnight at 4°C with 1D4-mAb-sepharose 2B (100 µL). The resin was transferred into a 1.5-mL Eppendorf tube, washed with Reaction Buffer (DPBS, pH 7.2, 0.1% (w/v) DM; 0.5 mL × 3, 30 minutes each time), and brought to a total volume of 300 µL. Alexa488-dibenzocyclooctyne (Molecular Probes/Thermo Fisher Scientific, 0.3 µL of 5 mM stock solution in DMSO) was added into the slurry to a final concentration of 5 µM. The reaction was allowed to proceed overnight (approximately 18 hours). The next day the reaction was stopped by centrifugation and removal of the supernatant fraction. The resin was transferred into a centrifugal filter with a 0.45-µm microporous hydrophilic PVDF membrane (Ultrafree-CL; Millipore) to facilitate washing. Alexa488-Rho was eluted as described for ROS Rho. The low-salt buffer elutes from the resin preferably the retinal-bound Rho, rather than the misfolded opsin (8). Based on our experience, the low-salt buffer was not essential for obtaining high-quality Rho from ROS membranes, in which the fraction of misfolded receptor was low. However, for wt or mutant Rho heterogeneously expressed in the HEK293F cells, the low-salt buffer served to increase the fraction of correctly folded, retinal-bound Rho. Purified samples were stored at -80°C and thawed on ice before use.

### **Immunoaffinity purification of opsin using 1D4-sepharose resin for the ITC experiment**

In a typical experiment, an aliquot of ROS membranes (0.25 mL, ~1.4 mg Rho) was solubilized using Solubilization Buffer (2.5 mL; 7.5 mg/mL CHAPS, 1 mg/mL POPC, 137.5 mM NaCl, 25 mM MES, 25 mM hemisodium HEPES, 0.25 mM disodium EDTA, pH 6.0, supplemented with 0.14 mL 10% (w/v) CHAPS in water). The mixture was gently agitated for 30 minutes at 4°C. The insoluble fraction was removed by centrifugation for 30 minutes at 100,000×g. The supernatant fraction was incubated at 4°C for 3 hours under gentle agitation with 1.6 mL packed 1D4-Sepharose 2B resin (with 4 mg 1D4 mAb per mL packed resin) pre-equilibrated with Wash Buffer (10 mg/mL CHAPS, 10 mg/mL POPC, 137.5 mM NaCl, 25 mM MES, 25 mM hemisodium HEPES, 0.25 mM disodium EDTA, pH 6.0). The resin was washed with Wash Buffer (6 mL × 4, 20 minutes each time), and then transferred into a 0.45-µm microporous centrifugal filtering unit, washed once with Wash Buffer (1 mL), and re-hydrated with 1 mL Wash Buffer supplemented with 50 mM hydroxylamine. The sample in the filtration unit was illuminated with a 500-nm long-pass filter equipped fiber optics coupled microscope illuminator (Dolan) for one hour with gentle head-over-head mixing. After the illumination, the resin was extensively washed with the POPC/CHAPS bicelle buffer (1.0 mL × 15). The large number of washing cycles ensured that the concentration of hydroxylamine is reduced below a level that could interfere with the ITC experiments. The Wash Buffer was removed by centrifugation and opsin was eluted (POPC/CHAPS bicelle buffer supplemented with 0.33 mg/mL nonapeptide, 1 mL × 2). Typically, the opsin concentration was in the range  $9 \pm 1 \mu\text{M}$  (corresponding to  $0.36 \pm 0.04 \text{ mg/mL}$  opsin).

### **Determination of molar extinction coefficients of 11CR, opsin and Rho in POPC/CHAPS bicelles**

The analysis of the results from titration calorimetry experiments in terms of molar binding enthalpies is critically dependent on a precise knowledge of the concentrations of ligand and protein solutions. Therefore it is necessary to determine the molar extinction coefficients under the experimental buffer conditions. The molar extinction of 11CR in ethanol was known ( $\epsilon_{376.5 \text{ nm}} = 24,935 \text{ M}^{-1} \text{ cm}^{-1}$ ) (9). The buffer effect on the absorption spectrum of 11CR was determined by diluting 11CR ethanolic stock solution into POPC/CHAPS bicelles (Figure S2A). The absorption maximum of 11CR in POPC/CHAPS bicelle buffer was observed at 378 nm, similar to the maximum in ethanol. The linear serial dilution experiment showed that in POPC/CHAPS bicelles, the absorbance of 11CR increased by 2.6% compared with the value in ethanol. The molar extinction coefficient ( $\epsilon_{378 \text{ nm}}$ ) of 11CR in POPC/CHAPS bicelles was thus calculated to be  $25,574 \text{ M}^{-1} \text{ cm}^{-1}$ . The A254/A378.5 ratio of the 11CR stock solution in ethanol was 0.73, slightly higher than the literature value of 0.69 (10) or 0.70 (9). This A254/A378.5 ratio indicated a high isomeric purity of the sample, as contamination of other retinoid species, such as ATR and 9CR, would lower this ratio. Reverse phase HPLC using an analytical C18 column demonstrated that the 11CR stock solution contained 2.4% impurities (Dr. Shixin Ye, personal communication).

To determine the molar extinction coefficients for opsin and Rho in POPC/CHAPS bicelles, a linear dilution series of 11CR (120 µL; 16 different concentrations ranging from 0 to 31.5 µM) were mixed with



purified opsin, as described for the ITC experiment (200  $\mu\text{L}$ ; 10.2  $\mu\text{M}$ ). The samples were incubated at room temperature for 4 hours in the dark. After the regeneration of opsin was complete, the UV-Vis spectra were recorded. The absorption of 11CR in buffer at 378 nm (corrected for a dilution factor  $df = 0.375$ ) and the absorption of Rho at 499 nm yielded a perfectly linear correlation at sub-stoichiometric ratios (Figure S2B, C), giving the molar extinction coefficient of Rho at 499 nm ( $\epsilon_{499 \text{ nm}} = 42,742 \text{ M}^{-1} \text{ cm}^{-1}$ ). The molar extinction coefficients of Rho and opsin at 279 nm were calculated using  $\epsilon_{499 \text{ nm}}$  of Rho as a reference.

## SUPPLEMENTAL DATA ANALYSES

### Calculation of bicelle concentration

We assumed that the bicelles took the shape of cylinder, with  $L$  as the length and  $d$  as the diameter. The head group area of phosphatidylcholine (area per lipid,  $A_{\text{POPC}}$ ) is  $0.71 \text{ nm}^2$  and lipid bilayer thickness ( $L$ ) is 5 nm. CHAPS is a bean-like detergent and it is difficult to estimate its geometrical dimension. Here we assume that each CHAPS molecule stretches a length of 0.26 nm ( $d_s$ ) along the circumference of the bicelle.

If bicelles took the shape of an equivalent sphere, the radius of the sphere ( $R_s$ ) would be given by

$$\frac{4}{3} \pi R_s^3 = \frac{\pi d^2 L}{4} \quad \text{Eq.(1)}$$

The dynamic light scattering experiments treated cylindrical bicelles as spheres. The correction factor of hydrodynamic radius of cylinder versus equivalent sphere is calculated by the following equation (11)

$$\frac{R_H}{R_s} = 1.0304 + 0.0193x + 0.06229x^2 + 0.00476x^3 + 0.00166x^4 + 2.663 \times 10^{-6}x^7 \quad \text{Eq.(2)}$$

Where

$$x = \ln(p) \text{ and } p = L / d \quad \text{Eq.(3)}$$

$R_H$  is given by dynamic light scattering experiment. Substitute  $R_s$  with

$$R_s = \left( \frac{3}{16} d^2 L \right)^{1/3} \quad \text{Eq.(4)}$$

$d$  can be resolved numerically from the experimentally determined hydrodynamic radius ( $R_H$ ) and estimated bicelle thickness ( $L$ ). The bicelle diameter  $d$  yields an estimate for the number of POPC molecules ( $n_{\text{POPC}}$ ) in one bicelle:

$$n_{\text{POPC}} = \frac{\pi d^2}{2A_{\text{POPC}}} = 2.21 \text{ nm}^{-2} d^2 \quad \text{Eq.(5)}$$

The concentration of bicelles can be given by

$$c_{\text{bicelle}} = \frac{c_{\text{POPC}}}{n_{\text{POPC}}} = \frac{0.452 \text{ nm}^{-2} c_{\text{POPC}}}{d^2} \quad \text{Eq.(6)}$$

In the experiments for deriving the energy diagram (*cf.* Figure 7A), the concentrations of POPC and CHAPS were both 1% (10 mg/mL), and their molar concentrations were 13 mM and 16 mM, respectively. CHAPS has a critical micelle concentration (CMC) of 6 to 10 mM. However, CMC is strictly valid only in the absence of any other binding partners. Even if the concentration of CHAPS is below its CMC, there is a small fraction of CHAPS available for stabilizing POPC. Because the ratio of available CHAPS to POPC

decreases dramatically, the size of the bicelles increases accordingly, and the concentration of bicelles also decreases.

In the experiment for measuring Rho regeneration kinetics (*cf.* Figure 5C), we used 1% (w/v) POPC/CHAPS (1:1), corresponding to 27  $\mu\text{M}$  bicelles. In a typical Trp fluorescence-quenching experiment for purified ROS Rho, the concentration of 11CR was 1.5-2.0  $\mu\text{M}$ , and the concentration of Rho was 0.2  $\mu\text{M}$ . Therefore, the ratio of bicelle-retinal-Rho was approximately 140:8:1.

### Comparing Trp-based and Alexa488-based FRET assays

In the Trp-based experiments, we observed varying degree of fluorescence quenching upon the addition of 11CR, which we attributed to: 1) the inner filter effect, 2) the dilution effect, and 3) the partitioning of retinal into the DM micelles or POPC/CHAPS bicelles. Here the slight change in the cuvette position due to pipetting or touching, and pipetting technique errors should be random and minor. Their contributions to the initial quenching are calculated as follows.

*Inner filter effect.* At 295nm 11CR has an extinction coefficient of  $26,000 \text{ M}^{-1} \text{ cm}^{-1}$ . Based on the shape of the cuvette chamber, the effective path length for fluorescence excitation in the center of the cuvette is 0.5 cm, while the emission light path is negligible. The concentration of retinal is about 1.5-2.0  $\mu\text{M}$ . The loss of excitation intensity at 295 nm is given by Beer-Lambert Law

$$A = \epsilon_{295} c [W] l = 26000 \text{ M}^{-1} \text{ cm}^{-1} \times 2 \times 10^{-6} \text{ M} \times 0.5 \text{ cm} = 0.026 \quad \text{Eq.(7)}$$

The transmittance is given by

$$T = 10^{-A} = 0.942 \quad \text{Eq.(8)}$$

Therefore, the absorbance ( $A$ ) due to the inner filter effect reduces the transmission ( $T$ ) in the middle of the cuvette ( $l = 0.5 \text{ cm}$ ) and accounts for 5.8% reduction in the Trp fluorescence. Experiments at a higher concentration of retinal would cause greater inner filter effects in the Trp fluorescence-quenching experiment.

*Dilution effect.* Adding retinal working solution (20  $\mu\text{L}$ ) into the assay buffer (480  $\mu\text{L}$ ) resulted in 4% reduction of the fluorescence signal.

*Partitioning effect.* The inner filter effect and the dilution effect together cause a reduction of the Trp signal by 9.6% ( $=1-0.942 \times 0.96$ ). In the 1% POPC/CHAPS bicelles (*cf.* Figure 4D), we observed 7.7% loss of signal, slighter smaller than the expected 9.6%, but within the error range of pipetting technique. The absence of the initial fast quenching step was not surprising, if we consider that in a typical experiment the concentration of bicelles (27  $\mu\text{M}$ ) was much higher than that of Rho (0.25-0.30  $\mu\text{M}$ ). In the case of 0.1% (w/v) DM (*cf.* Figure 4E), we observed a 44% decrease in Trp fluorescence, while in 2% (w/v) DM (*cf.* Figure 4E: inset) we only observed 15% loss of signal. After correcting for inner filter and dilution effects, the quenching in 0.1% (w/v) DM was 38% and in 2% (w/v) DM it was 6%.

By comparison, the Alexa488 signal from the engineered S144-Alexa488 Rho only suffered a 4% loss of signal due to the dilution effect. The Alexa488-based assay is more compatible with a high concentration of retinal and more suitable for measuring the ligand binding kinetics for “slow” mutants that would require much higher retinal concentrations to drive regeneration to completion.

### Comparing regeneration-independent quenching in bicelles and micelles

We have estimated that the concentration of bicelles for 1% POPC/CHAPS (27  $\mu\text{M}$ ) is one order of magnitude higher than the concentration of retinal (1.5-2  $\mu\text{M}$ ). The chance that retinal randomly co-inhabits the same bicelle as opsin was 7%. Therefore, the maximal regeneration-independent quenching of Trp fluorescence by retinal should be 7%.

The critical energy-transfer distance is dependent on the wavelength of the donor (Trp) and the acceptor (retinal). In the case of Trp fluorescence (ex. 295 nm, em. 330 nm), the critical distance is short, typically less than 30 Å based on literature values (12). Our DLS experiment showed that the hydrodynamic radius of 1% POPC/CHAPS bicelles is  $64.7 \pm 0.5$  Å. We observed an apparent 7.7% initial fast quenching (Figure 4D). Our calculation showed that the inner filter effect and the dilution effect together could cause a reduction of the Trp signal by 9.6%, which is even slightly higher than the observed 7.7%, but within the error range of pipetting. These numbers indicated that the energy transfer efficiency between retinal and Trp residues within in one POPC/CHAPS bicelle should be far below 100%, practically negligible.

In the 0.1% DM micelles we observed 44% initial fast quenching in 0.1% (w/v) DM, and after correcting for the inner filter and dilution effects it was 34%. We calculated the aggregation number of DM micelles based on a study that used small-angle X-ray scattering to determine the size and shape of detergent micelles (13). Based on these published parameters, 0.1% DM corresponds to DM micelles is approximately 20 to 25  $\mu\text{m}$  micelles, about the same concentration of bicelles in our 1% POPC/1%CHAPS system. Therefore, the probability that retinal randomly co-inhabits the same micelle as opsin was similar to the case of 1% POPC/CHAPS bicelles. However, in 0.1% DM, the regeneration-independent quenching of Trp is at least one order of magnitude higher than in 1% POPC/CHAPS. We infer that retinal in DM micelles does associate with opsin more closely, possibly as non-covalent complexes. In this case, retinal will have a higher probability residing in the same micelle or bicelle as the opsin. The remaining question is where retinal is bound in these non-covalent complexes, whether 11CR is docked into the ligand-binding pocket or it is associated with an external, secondary binding site at the outer surface of opsin. As we ruled out with the Alexa488 assay the formation of the covalent complex of the fully regenerated mature pigment, it would be hard to understand why a non-covalent complex with 11CR inside the ligand-binding pocket would not progress to the normal covalent Schiff base. Unless the conformation of the receptor would be very different from that of the rhodopsin ground state or the non-covalent binding site is outside of the orthosteric binding pocket.

In 2% DM, the fast initial drop in fluorescence indicates a quenching efficiency between opsin and retinal of 6% (after correcting the dilution and inner filter effect). The simplest explanation would be that the non-covalent opsin/retinal complex also formed in 2% DM, but since the local concentration of retinal in 2% DM decreases, the equilibrium shifts away from the non-covalent complex.

## Deriving the values in the energy diagram

Strategy for deriving the energy diagram (*c.f.* Figure 7)

In order to draw the energy diagram for a ligand-receptor binding reaction with a single transition state (TS), minimally two out of three of the following measurements need to be made: 1) the activation energy of the forward reaction ( $\Delta^\ddagger G_{\text{on}}$ ), 2) the activation energy of the reverse reaction ( $\Delta^\ddagger G_{\text{off}}$ ), and 3) the energy difference between the reactants and the products under a particular state ( $\Delta G^\circ$ ). Based on the transition state theory:

$$k = \frac{k_B T}{h} e^{-\frac{\Delta^\ddagger G}{RT}} = \frac{k_B T}{h} e^{-\frac{\Delta^\ddagger H - T\Delta^\ddagger S}{RT}} \quad \text{Eq.(11)}$$

Where  $\Delta^\ddagger G$  is the Gibbs energy of activation,  $\Delta^\ddagger H$  is the enthalpy of activation,  $\Delta^\ddagger S$  is the entropy of activation,  $k_B$  is Boltzmann's constant, and  $h$  is Planck's constant.  $\Delta^\ddagger G_{\text{on}}$  and  $\Delta^\ddagger G_{\text{off}}$  need to be obtained by kinetic measurements, while  $G^\circ$  requires a method to measure the energy difference between the reactants and the products.

Based on the linear form of the Eyring-Polanyi equation:

$$\ln \frac{k}{T} = -\frac{\Delta^\ddagger H}{R} \cdot \frac{1}{T} + \ln \frac{k_B}{h} + \frac{\Delta^\ddagger S}{R} \quad \text{Eq.(12)}$$

By measuring the temperature-dependent reaction kinetics, it is possible to separate the enthalpic and entropic contribution to free energy.

In our case, the kinetics of the forward reaction, *i.e.*, the recombination reaction between opsin and 11CR, was obtained using FRET-based assays. The kinetics of the reverse reaction, *i.e.*, the dissociation reaction of 11CR from Rho, was obtained by monitoring the exchange rate of the bound 11-*cis*-retinylene chromophore with 9CR. The enthalpy of reaction was measured by isothermal titration calorimetry (ITC).

Note that all the following calculations are done with 28°C data.

#### The free energy ( $\Delta G$ )

1. The free energy of activation of the forward reaction ( $\Delta^\ddagger G_{\text{on}} = 13.4 \pm 0.02 \text{ kcal mol}^{-1}$ ) was obtained from the retinal binding kinetics ( $k_2 = (1.08 \pm 0.04) \times 10^3 \text{ M}^{-1} \text{ s}^{-1}$ ) with a standard state ligand concentration ( $c^\circ$ ) of 1 m using  $k_{\text{on}} = c^\circ k_2$ :

$$\Delta^\ddagger G_{\text{on}} = -RT \ln \frac{k_{\text{on}} h}{k_B T} = 13.4 \text{ kcal mol}^{-1} \quad \text{Eq.(13)}$$

The error was given by:

$$\sigma(\Delta^\ddagger G_{\text{on}}) \approx RT \frac{\sigma(k_{\text{on}})}{k_{\text{on}}} = 0.02 \text{ kcal mol}^{-1} \quad \text{Eq.(14)}$$

2. The activation energy of the reverse reaction ( $\Delta^\ddagger G_{\text{off}} = 27.9 \pm 0.03 \text{ kcal mol}^{-1}$ ) was obtained from the chromophore exchange kinetics ( $k_{\text{off}} = (0.328 \pm 0.016) \times 10^{-7} \text{ s}^{-1}$ )

$$\Delta^\ddagger G_{\text{off}} = -RT \ln \frac{k_{\text{off}} h}{k_B T} = 27.9 \text{ kcal mol}^{-1} \quad \text{Eq.(15)}$$

The error was given by:

$$\sigma(\Delta^\ddagger G_{\text{off}}) \approx RT \frac{\sigma(k_{\text{off}})}{k_{\text{off}}} = 0.03 \text{ kcal mol}^{-1} \quad \text{Eq.(16)}$$

3. The free energy difference between the reactants and the products under a particular state ( $\Delta G^\circ = -14.5 \pm 0.04 \text{ kcal mol}^{-1}$ ) was obtained by dissociation constant:

$$K_d = k_{\text{off}} / k_{\text{on}} = 30 \text{ pM} \quad \text{Eq.(17)}$$

$$\Delta G^\circ = RT \ln K_d = -14.5 \text{ kcal mol}^{-1} \quad \text{Eq.(18)}$$

The error is given by:

$$\sigma(K_d) = K_d \left\{ \left[ \frac{\sigma(k_{\text{off}})}{k_{\text{off}}} \right]^2 + \left[ \frac{\sigma(k_{\text{on}})}{k_{\text{on}}} \right]^2 \right\}^{1/2} = 0.5 \text{ pM} \quad \text{Eq.(19)}$$

$$\sigma(\Delta G^\circ) \approx RT \frac{\sigma(K_d)}{K_d} = 0.04 \text{ kcal mol}^{-1} \quad \text{Eq.(20)}$$

In the energy diagram (*cf.* Figure 7A) we only indicated  $\Delta^\ddagger G_{\text{on}}$  and  $\Delta G^\circ$ .

#### The enthalpic term ( $\Delta H$ )

4. The activation enthalpy of the forward reaction ( $\Delta^\ddagger H_{\text{on}} = 20.2 \pm 0.9 \text{ kcal mol}^{-1}$ ) was obtained from the Eyring plot of the retinal binding kinetics (*cf.* Table S2). The error was derived from the fitting error.

$$\ln \frac{k_{\text{on}}}{T} = -\frac{\Delta^\ddagger H_{\text{on}}}{R} \frac{1}{T} + \ln \frac{k_B}{h} + \frac{\Delta^\ddagger S_{\text{on}}}{R} \quad \text{Eq.(21)}$$

5. The activation enthalpy of the reverse reaction ( $\Delta^\ddagger H_{\text{off}} = 38.4 \pm 4.4 \text{ kcal mol}^{-1}$ ) was obtained from the Eyring plot of the chromophore exchange kinetics (*cf.* Table S3). The error was derived from the fitting error.

$$\ln \frac{k_{\text{off}}}{T} = -\frac{\Delta^\ddagger H_{\text{off}}}{R} \frac{1}{T} + \ln \frac{k_B}{h} + \frac{\Delta^\ddagger S_{\text{off}}}{R} \quad \text{Eq.(22)}$$

6. The reaction enthalpy ( $\Delta H^\circ = -21.6 \pm 1.3 \text{ kcal mol}^{-1}$ ) was directly measured by the ITC experiment (*cf.* Figure 5). The error for the reaction enthalpy was obtained based on three independent measurements.

Ideally the difference between the activation enthalpy of the forward and reverse reactions should have the same value as the enthalpy of formation:

$$\Delta^\ddagger H_{\text{on}} - \Delta^\ddagger H_{\text{off}} - \Delta H^\circ = 0 \quad \text{Eq.(23)}$$

Insert the values above, we obtain:

$$\Delta^\ddagger H_{\text{on}} - \Delta^\ddagger H_{\text{off}} - \Delta H^\circ = 3.4 \pm 4.7 \text{ kcal mol}^{-1} \quad \text{Eq.(24)}$$

Therefore, the apparent discrepancy of the reaction enthalpy from isothermal titration calorimetry and from kinetic transition state theory analysis is with  $3.4 \pm 4.7 \text{ kcal mol}^{-1}$  statistically indistinguishable from zero considering the experimental errors.

*The entropic term ( $-T\Delta S$ )*

7. The activation entropy of the forward reaction ( $\Delta^\ddagger S_{\text{on}} = 22 \pm 3 \text{ cal mol}^{-1} \text{ K}^{-1}$ ) was obtained from the Eyring plot of the retinal binding kinetics (Eq.(21)). The entropic term ( $-T\Delta^\ddagger S_{\text{on}} = -6.7 \pm 0.9 \text{ kcal mol}^{-1}$ ) was calculated for 28°C. The error was derived from the fitting error.

8. The activation entropy of the reverse reaction ( $\Delta^\ddagger S_{\text{off}} = 34 \pm 14 \text{ cal mol}^{-1} \text{ K}^{-1}$ ) was obtained from the Eyring plot of the chromophore exchange kinetics (Eq.(22)). The entropic term ( $-T\Delta^\ddagger S_{\text{off}} = -10.4 \pm 4.4 \text{ kcal mol}^{-1}$ ) was calculated for 28°C. The error was derived from the fitting error.

9. The reaction entropy was calculated by

$$-T\Delta S^\circ = \Delta G^\circ - \Delta H^\circ = 7.3 \text{ kcal mol}^{-1} \quad \text{Eq.(25)}$$

The error was derived by:

$$\sigma(T\Delta S^\circ) = \left[ \sigma(\Delta G^\circ)^2 + \sigma(\Delta H^\circ)^2 \right]^{1/2} = 1.3 \text{ kcal mol}^{-1} \quad \text{Eq.(26)}$$

10. The change of reaction equilibrium constant can be calculated from Van't Hoff equation assuming a temperature-independent reaction enthalpy:

$$\ln \left( \frac{K_2}{K_1} \right) = \frac{-\Delta H}{R} \left( \frac{1}{T_2} - \frac{1}{T_1} \right) \quad \text{Eq.(27)}$$

Assuming the reaction enthalpy measured at 28°C remains a constant between 25°C and 37°C, for the formation reaction  $\Delta H^\circ = -21.6 \pm 1.3 \text{ kcal mol}^{-1}$ , then the  $K_d$  at 25°C and 37°C are 21 pM and 86 pM, respectively.

The equilibrium constant can also be estimated by extrapolating the reaction kinetics. At 25°C,  $k_2$  is  $6.9 \times 10^2 \text{ M}^{-1} \text{ s}^{-1}$ , and  $k_{\text{off}}$  is  $1.7 \times 10^{-8} \text{ s}^{-1}$ . At 37°C,  $k_2$  is  $2.7 \times 10^3 \text{ M}^{-1} \text{ s}^{-1}$  and  $k_{\text{off}}$  is  $2.2 \times 10^{-7} \text{ s}^{-1}$ . Thus  $K_d$  at 25°C and 37°C are 25 pM and 82 pM, respectively.

#### 11. The effect of lipids on the dissociation constant

The regeneration reaction is bimolecular and its kinetics ( $k_2$ ) is inversely correlated to concentration of lipids. The  $k_2$  extrapolated from our experimental results would be  $235 \text{ M}^{-1} \text{ s}^{-1}$  at 37°C, slightly smaller than the value measured in ROS membrane ( $k_2 = 3.0 \sim 4.0 \times 10^2 \text{ M}^{-1} \text{ s}^{-1}$  at 35°C) (14). In the calculation below, we assume a  $k_2$  of  $300 \text{ M}^{-1} \text{ s}^{-1}$  at 37°C. The dissociation reaction is unimolecular, and the rate ( $k_{\text{off}} = 2.2 \times 10^{-7} \text{ s}^{-1}$  at 37°C) should be independent of lipids. Because the dissociation constant  $K_d = k_{\text{off}}/k_2$ , then in ROS membrane

$$K_{d, \text{ROS}} = (2.2 \times 10^{-7} \text{ s}^{-1}) / (300 \text{ M}^{-1} \text{ s}^{-1}) = 0.73 \text{ nM} \quad \text{Eq.(28)}$$

Therefore, the  $K_d$  in ROS membrane is 9-fold larger than that in 1% (w/v) POPC/CHAPS bicelles, corresponding to a difference of 1.3 kcal in  $\Delta G^\circ$ . On the energy diagram, the barrier for the forward reaction would be higher by 1.3 kcal, and for the reverse reaction unchanged.

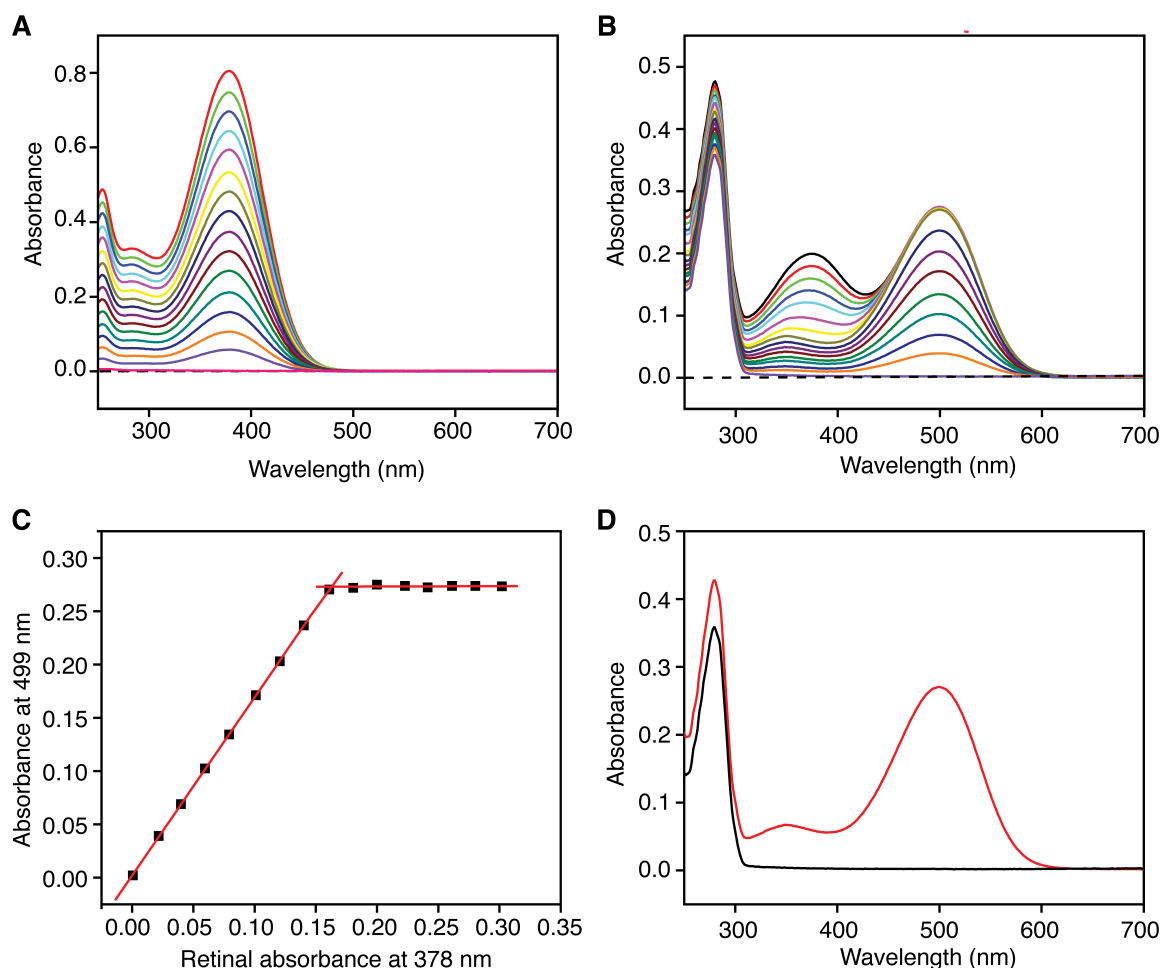

Figure S1. Characterization of the recombination product between opsin and 11CR. (A) 11CR ethanolic stock solution was diluted in POPC/CHAPS bicelles to evaluate the buffer effect on 11CR absorption. The extinction coefficient of 11CR in POPC/CHAPS bicelle buffer ( $\epsilon_{378 \text{ nm}}$ ) was determined to be  $25,574 \text{ M}^{-1} \text{ cm}^{-1}$ . (B) Aliquots of 11CR (120  $\mu\text{L}$ , linear dilution series with 16 concentrations in the range from 0 to 31.5  $\mu\text{M}$ ) was mixed with aliquots of purified opsin (200  $\mu\text{L}$ , 10.2  $\mu\text{M}$ ). The UV-Vis spectrum of each sample was recorded after the binding reaction was complete. (C) The 378-nm absorbance of 11CR (Panel A, corrected for a dilution factor of 0.375) was plotted against the 499-nm absorbance of Rho (Panel B). The perfect linear correlation before the saturation of the retinal-binding site yielded the molar extinction coefficient of Rho at 499 nm ( $\epsilon_{499 \text{ nm}} = 42,742 \text{ M}^{-1} \text{ cm}^{-1}$ ). (D) The absorption spectra of opsin (*black*) and Rho (*red*) are compared. The resulting  $A_{279}/A_{499}$  ratio of Rho at the equivalence point is  $1.58 \pm 0.01$ , which indicates the recombination product between opsin and 11CR has a slightly higher purity than previously best results obtained by column chromatography: 1.65–1.75 (15), and 1.60–1.70 (16). Thus opsin in POPC/CHAPS bicelles is fully regenerable. The extinction coefficients of Rho and opsin at 279 nm were calculated by using the 499-nm absorbance of Rho as the reference.

Table S1. Molar extinction coefficient of opsin and Rho in POPC/CHAPS bicelles.

|       | $\epsilon_{279 \text{ nm}}, \text{M}^{-1} \text{cm}^{-1}$ | $\epsilon_{499 \text{ nm}}, \text{M}^{-1} \text{cm}^{-1}$ |
|-------|-----------------------------------------------------------|-----------------------------------------------------------|
| Opsin | $56,057 \pm 184$                                          | –                                                         |
| Rho   | $67,532 \pm 221$                                          | 42,742                                                    |



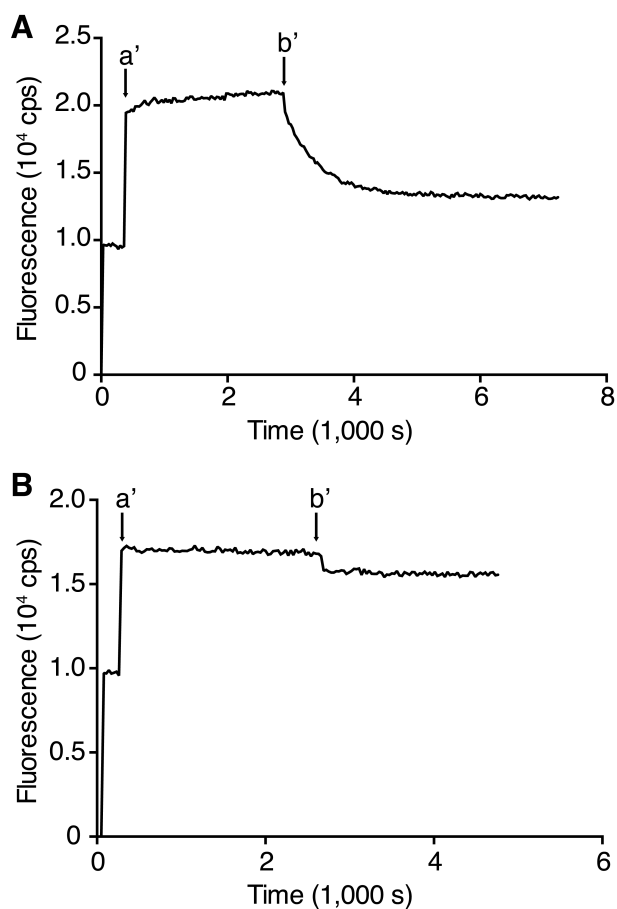

Figure S2. The regeneration of micelle-solubilized Rho after transfer into bicelles, measured by the Trp fluorescence-quenching assay. (A) Dark-state Rho solubilized in 0.1% DM (30  $\mu$ L) was photobleached to form the active Meta-II state. The sample was incubated at 28°C for 40 min (not shown), 60 min (Panel A) or 13 hours (Panel B). Then the sample was added into the POPC/CHAPS bicelle buffer (450  $\mu$ L, arrow  $a'$ ). Exogenous 11CR solution (20  $\mu$ L) was added later (arrow  $b'$ ). (B) No regeneration can be observed for the 13-hour sample, indicating complete denaturation of opsin. For the 40-min sample and 60-min sample, the second-order rate constant for Rho regeneration ( $k_2$ ) at 28°C was  $1.0 \pm 0.2 \times 10^3 \text{ M}^{-1} \text{ s}^{-1}$ . This value is in agreement with the results obtained for Rho reconstituted in bicelles ( $1.08 \pm 0.04 \times 10^3 \text{ M}^{-1} \text{ s}^{-1}$ , at 28°C).

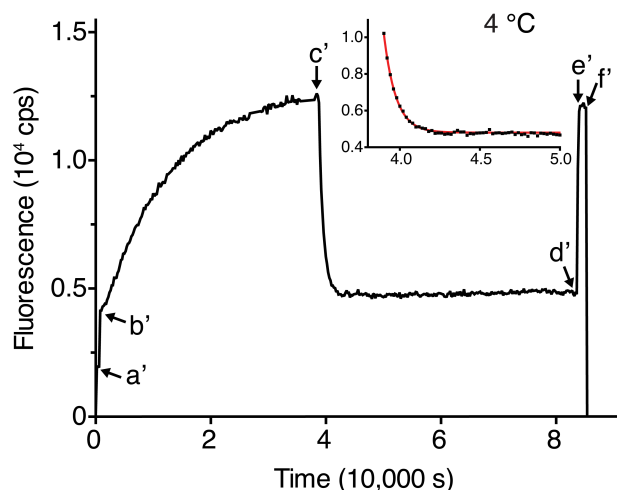

Figure S3. The regeneration of micelle-solubilized Rho at 4°C, measured by the Trp fluorescence-quenching assay. The sample compartment was cooled to 4°C by water bath. Dry air was blown through the sample compartment to prevent condensation on the cuvette. Dark-state Rho solubilized in 0.1% DM (30  $\mu$ L) was added into the 1% DM micelle buffer (450  $\mu$ L, arrow a'). 11 hours after photobleaching (arrow b'), exogenous 11CR solution (20  $\mu$ L) was added (arrow c'). After overnight regeneration, 50 mM  $\text{NH}_2\text{OH}$  was added (arrow d'), and then the sample was photobleached again (arrow e'). The increase in Trp fluorescence in response to illumination indicates formation of mature pigment. At the end of acquisition, the shutter was closed to record the dark count (arrow f'). Inset: the change of Trp fluorescence signal after the addition of 11CR was fitted with a mono-exponential model. The second-order rate constant for Rho regeneration in 1% DM at 4°C was  $1.4 \times 10^3 \text{ M}^{-1} \text{ s}^{-1}$ .

Table S2. Second-order rate constants ( $k_2$ ) for the recombination reaction between opsin and 11CR, and the thermodynamic parameters calculated from Eyring and Arrhenius plot.

|                                                                   | ROS<br>Rho <sup>a</sup> | PMT4<br>Rho <sup>a</sup> | S144-Alexa488<br>Rho <sup>b</sup> |
|-------------------------------------------------------------------|-------------------------|--------------------------|-----------------------------------|
| $k_2$ (36°C, $10^3 \text{ M}^{-1} \text{ s}^{-1}$ )               | $2.2 \pm 0.2$           | $2.4 \pm 0.6$            | $2.8 \pm 0.5$                     |
| $k_2$ (28°C, $10^3 \text{ M}^{-1} \text{ s}^{-1}$ )               | $1.08 \pm 0.04$         | $0.91 \pm 0.31$          | $1.2 \pm 0.2$                     |
| $k_2$ (20°C, $10^3 \text{ M}^{-1} \text{ s}^{-1}$ )               | $0.37 \pm 0.03$         | $0.28 \pm 0.06$          | $0.57 \pm 0.13$                   |
| $k_2$ (12°C, $10^3 \text{ M}^{-1} \text{ s}^{-1}$ )               | $0.13 \pm 0.3$          | $0.13 \pm 0.2$           | $0.19 \pm 0.4$                    |
| $\Delta^\ddagger H_{\text{on}}$ (kcal mol <sup>-1</sup> )         | $20.2 \pm 0.9$          | $21.3 \pm 1.3$           | $18.8 \pm 1.0$                    |
| $-T\Delta^\ddagger S_{\text{on}}$ (28°C, kcal mol <sup>-1</sup> ) | $-6.7 \pm 0.9$          | $-7.7 \pm 1.3$           | $-5.4 \pm 1.0$                    |
| $\Delta^\ddagger G_{\text{on}}$ (28°C, kcal mol <sup>-1</sup> )   | $13.4 \pm 0.02$         | $13.5 \pm 0.2$           | $13.4 \pm 0.1$                    |
| $E_{\text{a,on}}$ (kcal mol <sup>-1</sup> )                       | $20.8 \pm 0.9$          | $21.9 \pm 1.3$           | $19.4 \pm 1.0$                    |
| $\ln(A/(M^{-1}s^{-1}))$                                           | $41.6 \pm 1.6$          | $43.4 \pm 2.2$           | $39.5 \pm 1.7$                    |

<sup>a</sup>Measured by Trp fluorescence-quenching assay

<sup>b</sup>Measured by Alexa488 fluorescence-quenching assay

## SUPPLEMENTAL REFERENCES

1. Papermaster, D. S., and W. J. Dreyer. 1974. Rhodopsin content in the outer segment membranes of bovine and frog retinal rods. *Biochemistry* 13:2438-2444.
2. Botelho, A. V., N. J. Gibson, R. L. Thurmond, Y. Wang, and M. F. Brown. 2002. Conformational energetics of rhodopsin modulated by nonlamellar-forming lipids. *Biochemistry* 41:6354-6368.
3. Oprian, D. D., R. S. Molday, R. J. Kaufman, and H. G. Khorana. 1987. Expression of a synthetic bovine rhodopsin gene in monkey kidney cells. *Proc. Natl. Acad. Sci.* 84:8874-8878.
4. Knepp, A. M., A. Grunbeck, S. Banerjee, T. P. Sakmar, and T. Huber. 2011. Direct measurement of thermal stability of expressed CCR5 and stabilization by small molecule ligands. *Biochemistry* 50:502-511.
5. Tian, H., T. P. Sakmar, and T. Huber. 2017. Measurement of Slow Spontaneous Release of 11-*cis*-Retinal from Rhodopsin. *Biophys. J.* 112:153-161.
6. Tian, H., S. Naganathan, M. A. Kazmi, T. W. Schwartz, T. P. Sakmar, and T. Huber. 2014. Bioorthogonal fluorescent labeling of functional G protein-coupled receptors. *ChemBioChem* 15:1820-1829.
7. Starace, D. M., and B. E. Knox. 1998. Cloning and expression of a *Xenopus* short wavelength cone pigment. *Exp. Eye Res.* 67:209-220.
8. Ridge, K. D., Z. Lu, X. Liu, and H. G. Khorana. 1995. Structure and function in rhodopsin. Separation and characterization of the correctly folded and misfolded opsins produced on expression of an opsin mutant gene containing only the native intradiscal cysteine codons. *Biochemistry* 34:3261-3267.
9. Brown, P. K., and G. Wald. 1956. Neo-B isomer of vitamin-A and retinene. *J. Biol. Chem.* 222:865-877.
10. Dieterle, J. M., and C. D. Robeson. 1954. Crystalline neoretinene-B. *Science* 120:219-220.
11. Hansen, S. 2004. Translational friction coefficients for cylinders of arbitrary axial ratios estimated by Monte Carlo simulation. *J. Chem. Phys.* 121:9111-9115.
12. Wu, P., and L. Brand. 1994. Resonance energy transfer: methods and applications. *Anal. Biochem.* 218:1-13.
13. Lipfert, J., L. Columbus, V. B. Chu, S. A. Lesley, and S. Doniach. 2007. Size and shape of detergent micelles determined by small-angle X-ray scattering. *J. Phys. Chem. B* 111:12427-12438.
14. Kawaguchi, T., T. Hamanaka, and Y. Kito. 1986. Kinetic study of transfer of 11-*cis*-retinal between rod outer segment membranes using regeneration of rhodopsin. *Biophys. Chem.* 24:5-12.
15. Litman, B. J. 1982. Purification of rhodopsin by concanavalin A affinity chromatography. *Method Enzymol.* 81:150-153.
16. Degrip, W. J. 1982. Purification of bovine rhodopsin over concanavalin A-sepharose. *Method Enzymol.* 81:197-207.
